# Supplementary material for: Metabolic responses of rice source and sink organs during recovery from combined drought and heat stress in the field
Source: PubMed Central journal article supplement (PMC6703437; doi:10.1093/gigascience/giz102), 2019-08-21

## Metabolic responses of rice source and sink organs during recovery from combined drought and heat stress in the field --Manuscript Draft--

|                                                      |                                                                                                                                                                                                                                                                                                                                                                                                                                                                                                                                                                                                                                                                                                                                                                                                                                                                                                                                                                                                                                                                                                                                                                                                                                                                                                                                                                                                                                                                                                                                                                                                                                                                                                                                                                                                                                              |                           |
|------------------------------------------------------|----------------------------------------------------------------------------------------------------------------------------------------------------------------------------------------------------------------------------------------------------------------------------------------------------------------------------------------------------------------------------------------------------------------------------------------------------------------------------------------------------------------------------------------------------------------------------------------------------------------------------------------------------------------------------------------------------------------------------------------------------------------------------------------------------------------------------------------------------------------------------------------------------------------------------------------------------------------------------------------------------------------------------------------------------------------------------------------------------------------------------------------------------------------------------------------------------------------------------------------------------------------------------------------------------------------------------------------------------------------------------------------------------------------------------------------------------------------------------------------------------------------------------------------------------------------------------------------------------------------------------------------------------------------------------------------------------------------------------------------------------------------------------------------------------------------------------------------------|---------------------------|
| <b>Manuscript Number:</b>                            | GIGA-D-19-00175                                                                                                                                                                                                                                                                                                                                                                                                                                                                                                                                                                                                                                                                                                                                                                                                                                                                                                                                                                                                                                                                                                                                                                                                                                                                                                                                                                                                                                                                                                                                                                                                                                                                                                                                                                                                                              |                           |
| <b>Full Title:</b>                                   | Metabolic responses of rice source and sink organs during recovery from combined drought and heat stress in the field                                                                                                                                                                                                                                                                                                                                                                                                                                                                                                                                                                                                                                                                                                                                                                                                                                                                                                                                                                                                                                                                                                                                                                                                                                                                                                                                                                                                                                                                                                                                                                                                                                                                                                                        |                           |
| <b>Article Type:</b>                                 | Research                                                                                                                                                                                                                                                                                                                                                                                                                                                                                                                                                                                                                                                                                                                                                                                                                                                                                                                                                                                                                                                                                                                                                                                                                                                                                                                                                                                                                                                                                                                                                                                                                                                                                                                                                                                                                                     |                           |
| <b>Funding Information:</b>                          | German Federal Ministry of Economic Cooperation and Development (11.7860.7-001.00)                                                                                                                                                                                                                                                                                                                                                                                                                                                                                                                                                                                                                                                                                                                                                                                                                                                                                                                                                                                                                                                                                                                                                                                                                                                                                                                                                                                                                                                                                                                                                                                                                                                                                                                                                           | Dr. Krishna S.V. Jagadish |
| <b>Abstract:</b>                                     | <p>Background: Drought and heat stress effects on rice have been extensively studied, in particular during the sensitive flowering and grain-filling stages. However, in the field these stresses usually occur together because reduced transpirational cooling under drought conditions results in increased plant tissue temperature. In addition, environmental stresses are usually transient and the ability to efficiently recover from stress may be at least as important for overall stress tolerance as the direct stress response itself. Nevertheless, nothing is known about recovery mechanisms after drought and heat stress in rice under field conditions.</p> <p>Results: We have used gas chromatography-mass spectrometry (GC-MS)-based metabolomics to elucidate the metabolic responses of flag leaves, flowering spikelets and developing seeds from three rice cultivars differing in their drought and heat tolerance to rewatering after stress in the field. Within 60 h after rewatering, many stress-responsive metabolites returned to their control levels, although recovery was not complete. In addition, control plants showed developmental differences that were revealed by metabolite profiles during 60 h of post-stress sampling, in particular in developing seeds. Correlation analysis identified several metabolites as marker candidates for the stability of grain yield or quality under conditions of combined drought and heat stress.</p> <p>Conclusions: The rewatering responses of stressed plants seemed to be a combination of the reversal of stress effects and reinitiation of development after stress relief. The identified potential markers can be useful in efforts to breed stress-tolerant rice germplasm to ensure food security under changing climate conditions.</p> |                           |
| <b>Corresponding Author:</b>                         | Dirk K Hincha<br>Max-Planck-Institut für Molekulare Pflanzenphysiologie<br>Potsdam, GERMANY                                                                                                                                                                                                                                                                                                                                                                                                                                                                                                                                                                                                                                                                                                                                                                                                                                                                                                                                                                                                                                                                                                                                                                                                                                                                                                                                                                                                                                                                                                                                                                                                                                                                                                                                                  |                           |
| <b>Corresponding Author Secondary Information:</b>   |                                                                                                                                                                                                                                                                                                                                                                                                                                                                                                                                                                                                                                                                                                                                                                                                                                                                                                                                                                                                                                                                                                                                                                                                                                                                                                                                                                                                                                                                                                                                                                                                                                                                                                                                                                                                                                              |                           |
| <b>Corresponding Author's Institution:</b>           | Max-Planck-Institut für Molekulare Pflanzenphysiologie                                                                                                                                                                                                                                                                                                                                                                                                                                                                                                                                                                                                                                                                                                                                                                                                                                                                                                                                                                                                                                                                                                                                                                                                                                                                                                                                                                                                                                                                                                                                                                                                                                                                                                                                                                                       |                           |
| <b>Corresponding Author's Secondary Institution:</b> |                                                                                                                                                                                                                                                                                                                                                                                                                                                                                                                                                                                                                                                                                                                                                                                                                                                                                                                                                                                                                                                                                                                                                                                                                                                                                                                                                                                                                                                                                                                                                                                                                                                                                                                                                                                                                                              |                           |
| <b>First Author:</b>                                 | Lovely Mae F Lawas                                                                                                                                                                                                                                                                                                                                                                                                                                                                                                                                                                                                                                                                                                                                                                                                                                                                                                                                                                                                                                                                                                                                                                                                                                                                                                                                                                                                                                                                                                                                                                                                                                                                                                                                                                                                                           |                           |
| <b>First Author Secondary Information:</b>           |                                                                                                                                                                                                                                                                                                                                                                                                                                                                                                                                                                                                                                                                                                                                                                                                                                                                                                                                                                                                                                                                                                                                                                                                                                                                                                                                                                                                                                                                                                                                                                                                                                                                                                                                                                                                                                              |                           |
| <b>Order of Authors:</b>                             | Lovely Mae F Lawas                                                                                                                                                                                                                                                                                                                                                                                                                                                                                                                                                                                                                                                                                                                                                                                                                                                                                                                                                                                                                                                                                                                                                                                                                                                                                                                                                                                                                                                                                                                                                                                                                                                                                                                                                                                                                           |                           |
|                                                      | Alexander Erban                                                                                                                                                                                                                                                                                                                                                                                                                                                                                                                                                                                                                                                                                                                                                                                                                                                                                                                                                                                                                                                                                                                                                                                                                                                                                                                                                                                                                                                                                                                                                                                                                                                                                                                                                                                                                              |                           |
|                                                      | Joachim Kopka                                                                                                                                                                                                                                                                                                                                                                                                                                                                                                                                                                                                                                                                                                                                                                                                                                                                                                                                                                                                                                                                                                                                                                                                                                                                                                                                                                                                                                                                                                                                                                                                                                                                                                                                                                                                                                |                           |
|                                                      | Krishna S.V. Jagadish                                                                                                                                                                                                                                                                                                                                                                                                                                                                                                                                                                                                                                                                                                                                                                                                                                                                                                                                                                                                                                                                                                                                                                                                                                                                                                                                                                                                                                                                                                                                                                                                                                                                                                                                                                                                                        |                           |
|                                                      | Ellen Zuther                                                                                                                                                                                                                                                                                                                                                                                                                                                                                                                                                                                                                                                                                                                                                                                                                                                                                                                                                                                                                                                                                                                                                                                                                                                                                                                                                                                                                                                                                                                                                                                                                                                                                                                                                                                                                                 |                           |
|                                                      | Dirk K Hincha                                                                                                                                                                                                                                                                                                                                                                                                                                                                                                                                                                                                                                                                                                                                                                                                                                                                                                                                                                                                                                                                                                                                                                                                                                                                                                                                                                                                                                                                                                                                                                                                                                                                                                                                                                                                                                |                           |
| <b>Order of Authors Secondary Information:</b>       |                                                                                                                                                                                                                                                                                                                                                                                                                                                                                                                                                                                                                                                                                                                                                                                                                                                                                                                                                                                                                                                                                                                                                                                                                                                                                                                                                                                                                                                                                                                                                                                                                                                                                                                                                                                                                                              |                           |

| Additional Information:                                                                                                                                                                                                                                                                                                                                                                                                                                                                                                             |          |
|-------------------------------------------------------------------------------------------------------------------------------------------------------------------------------------------------------------------------------------------------------------------------------------------------------------------------------------------------------------------------------------------------------------------------------------------------------------------------------------------------------------------------------------|----------|
| Question                                                                                                                                                                                                                                                                                                                                                                                                                                                                                                                            | Response |
| Are you submitting this manuscript to a special series or article collection?                                                                                                                                                                                                                                                                                                                                                                                                                                                       | No       |
| <p><b>Experimental design and statistics</b></p> <p>Full details of the experimental design and statistical methods used should be given in the Methods section, as detailed in our <a href="#">Minimum Standards Reporting Checklist</a>. Information essential to interpreting the data presented should be made available in the figure legends.</p> <p>Have you included all the information requested in your manuscript?</p>                                                                                                  | Yes      |
| <p><b>Resources</b></p> <p>A description of all resources used, including antibodies, cell lines, animals and software tools, with enough information to allow them to be uniquely identified, should be included in the Methods section. Authors are strongly encouraged to cite <a href="#">Research Resource Identifiers</a> (RRIDs) for antibodies, model organisms and tools, where possible.</p> <p>Have you included the information requested as detailed in our <a href="#">Minimum Standards Reporting Checklist</a>?</p> | Yes      |
| <p><b>Availability of data and materials</b></p> <p>All datasets and code on which the conclusions of the paper rely must be either included in your submission or deposited in <a href="#">publicly available repositories</a> (where available and ethically appropriate), referencing such data using a unique identifier in the references and in the “Availability of Data and Materials” section of your manuscript.</p>                                                                                                      | Yes      |

Have you have met the above requirement as detailed in our [Minimum Standards Reporting Checklist](#)?

1 **Metabolic responses of rice source and sink organs during recovery from combined**  
2 **drought and heat stress in the field**

3

4 Lovely Mae F. Lawas<sup>1</sup>, Alexander Erban<sup>1</sup>, Joachim Kopka<sup>1</sup>, S.V. Krishna Jagadish<sup>2,3</sup>, Ellen  
5 Zuther<sup>1</sup>, Dirk K. Hincha<sup>1,\*</sup>

6 <sup>1</sup>Max-Planck-Institute of Molecular Plant Physiology, D-14476 Potsdam, Germany

7 <sup>2</sup>International Rice Research Institute, DAPO Box 7777, Metro Manila, Philippines

8 <sup>3</sup>Department of Agronomy, Kansas State University, Manhattan, Kansas 66506, USA

9

10 \*Corresponding author:

11 Dirk K. Hincha, Max-Planck-Institute of Molecular Plant Physiology, Am Mühlenberg 1, D-

12 14476 Potsdam, Germany

13

14

15 e-mail addresses:

16 LMFL: Lawas@mpimp-golm.mpg.de

17 AE: Erban@mpimp-golm.mpg.de

18 JK: Kopka@mpimp-golm.mpg.de

19 SVKJ: kjagadish@ksu.edu

20 EZ: Zuther@mpimp-golm.mpg.de

21 DKH: Hincha@mpimp-golm.mpg.de

22

23

24 **Abstract**

25 **Background:** Drought and heat stress effects on rice have been extensively studied, in particular  
26 during the sensitive flowering and grain-filling stages. However, in the field these stresses  
27 usually occur together because reduced transpirational cooling under drought conditions results  
28 in increased plant tissue temperature. In addition, environmental stresses are usually transient  
29 and the ability to efficiently recover from stress may be at least as important for overall stress  
30 tolerance as the direct stress response itself. Nevertheless, nothing is known about recovery  
31 mechanisms after drought and heat stress in rice under field conditions.

32 **Results:** We have used gas chromatography-mass spectrometry (GC-MS)-based metabolomics  
33 to elucidate the metabolic responses of flag leaves, flowering spikelets and developing seeds  
34 from three rice cultivars differing in their drought and heat tolerance to rewatering after stress in  
35 the field. Within 60 h after rewatering, many stress-responsive metabolites returned to their  
36 control levels, although recovery was not complete. In addition, control plants showed  
37 developmental differences that were revealed by metabolite profiles during 60 h of post-stress  
38 sampling, in particular in developing seeds. Correlation analysis identified several metabolites as  
39 marker candidates for the stability of grain yield or quality under conditions of combined drought  
40 and heat stress.

41 **Conclusions:** The rewatering responses of stressed plants seemed to be a combination of the  
42 reversal of stress effects and reinitiation of development after stress relief. The identified  
43 potential markers can be useful in efforts to breed stress-tolerant rice germplasm to ensure food  
44 security under changing climate conditions.

45

46 **Keywords:** combined stress, drought stress, flowering, grain filling, heat stress, marker  
47 metabolites, metabolomics, recovery, rice (*Oryza sativa*)

48

## 49 **Background**

50 Plant growth and productivity are threatened by exposure to extreme environmental  
51 conditions [1–3]. Temperature and precipitation extremes have resulted, among other climate-  
52 related consequences, in heat waves and drought events [4,5] that are projected to continue with  
53 increased frequency and intensity in the future [4,6,7]. In parallel, models indicate that high  
54 temperature and water scarcity have caused yield losses [8,9], which will be exacerbated under  
55 future climate scenarios [10,11]. Rice is among the major crops that have been negatively  
56 impacted by drought and heat [12,13], and this poses a serious threat to food security because  
57 rice is a staple food for almost half of the world’s population [14].

58 The effects of heat [15–18] and drought [19–21] on rice have been extensively studied,  
59 particularly during the stress-sensitive flowering and grain-filling stages, where they result in  
60 significant grain yield and quality losses. Furthermore, the responses of rice to the simultaneous  
61 occurrence of these two stresses have been documented [22–26]. Over recent years, an  
62 increasing number of studies have focused on the effects of combined drought and heat stress on  
63 plants [27,28] due to the recognition that stress combinations are frequent under field conditions  
64 and are more detrimental for plants than the single stresses [29]. Yet the molecular mechanisms  
65 enabling tolerance to combined drought and heat stress still remain to be elucidated, particularly  
66 in cereals [28]. In addition, there is still very little knowledge about the effects of combined  
67 stress on plants grown under field conditions.

68 In most cases, abiotic stresses are transient, with fluctuating temperatures and drought  
69 periods followed by rain, and hence plants are subjected to episodes of stress and recovery [30].  
70 Plant survival is in fact determined by both the responses during exposure to stress and during  
71 the subsequent recovery phase [31,32]. The extent of recovery depends on the duration and  
72 intensity of the stress, and the plant genotype, growth stage and organ/tissue that is examined  
73 [33,34]. While the effects of abiotic stresses on plants and the mechanisms by which plants cope  
74 with such environmental conditions have been studied in detail, little is known about how plants  
75 respond during recovery. In rice, morpho-physiological traits, ABA levels, gene expression and  
76 protein levels change during recovery from heat [34,35] and drought [36–38]. In contrast,  
77 nothing is known about the recovery process from combined drought and heat stress in rice and  
78 there is very limited information about this process in other plant species as well. Most of the  
79 stress-induced physiological, biochemical, and metabolic changes observed under stress are  
80 reversed upon recovery in eucalypts [39], while combined drought and heat stress induces  
81 irreversible changes in water status and chloroplast ultrastructure of tomato leaves [40].

82 We have conducted experiments to evaluate the responses of field-grown rice to combined  
83 drought and heat stress, by withholding water and thus limiting transpirational cooling, and  
84 subsequent recovery after rewatering and have reported the effects on agronomic and  
85 physiological parameters of three cultivars with contrasting stress tolerance [25]. In addition, we  
86 have reported the effects of mild and severe stress treatments on the metabolome of flag leaves,  
87 flowering spikelets and developing seeds from the same plants [26]. In the current study, we  
88 analyzed the metabolic changes during rewatering following severe drought and heat stress. The  
89 objectives of this study were to (i) analyze the metabolite profiles of flag leaves, flowering  
90 spikelets, and developing seeds of the three differentially drought and heat tolerant rice cultivars

91 N22, Dular and Anjali under control, combined drought and heat stress, and rewatering  
92 conditions; (ii) compare the metabolite contents of flag leaves and developing seeds collected  
93 under fully flooded control conditions on four consecutive days during the early grain-filling  
94 stage; (iii) evaluate changes in the content of stress-responsive metabolites in each organ during  
95 rewatering at the flowering and early grain-filling stages; and (iv) identify metabolites whose  
96 changes in levels between stress and recovery were significantly correlated with reduced grain  
97 yield and quality due to combined drought and heat stress.

98

### 99 **Data description**

100 Field experiments were performed in three consecutive years (2013, 2014, 2015) during the  
101 dry season (flowering and early grain-filling in late April to early May, coinciding with the  
102 hottest time of the year) at the International Rice Research Institute (IRRI) in the Philippines.  
103 Experiments included the rice cultivars N22 (drought, heat, and combined drought and heat  
104 tolerant), Dular (drought tolerant, heat and combined drought and heat susceptible), and Anjali  
105 (drought, heat, and combined drought and heat susceptible) [23]. Samples were collected from  
106 plants that were either grown under fully flooded control conditions, or were drought stressed  
107 during the flowering or early grain-filling stage. At the end of the stress period, plants were  
108 rewatered and additional samples were taken 12 h, 36 h and 60 h after rewatering. Drought  
109 induced an increase in panicle temperature due to the lack of transpirational cooling, resulting in  
110 heat stress [25]. This combined drought and heat stress resulted in significant reductions in grain  
111 yield and quality [25]. Samples were taken from flag leaves, flowering spikelets and developing  
112 seeds and soluble metabolites were profiled by GC-MS. The data from these 1241 samples have  
113 been deposited in the MetaboLights database [41] and are freely available at GigaDB [42].



114 Details of the metabolite identification and filtering to obtain the final set of metabolites used for  
115 detailed analysis are reported in our previous publication [26]. An in-depth analysis of the data  
116 from 444 samples obtained under well-watered control conditions, during the early, mild stress  
117 phase and during the late, more severe stress phase has been presented recently [26]. Here, we  
118 analyzed the metabolomic responses of the plants to rewatering after exposure to severe drought  
119 and heat stress. This analysis comprises the same sets of metabolites that were obtained by GC-  
120 MS analysis (81 in flag leaves, 88 in flowering spikelets and 67 in developing seeds) in our  
121 previous study. We analyzed data from 1151 samples that were obtained under control  
122 conditions, during severe drought and heat stress and 12 h, 36 h, and 60 h after rewatering. The  
123 90 samples that were collected during the early, mild stress phase, which preceded the severe  
124 stress, were not considered. We identified metabolites that were significantly changed in their  
125 abundance after rewatering compared to the severe stress situation and correlated these changes  
126 with either the reduction in yield or the loss of grain quality under stress. These metabolites  
127 constitute potential metabolic markers that may be used for the breeding of new stress-tolerant  
128 rice cultivars.

129

### 130 **Analysis and discussion**

131 Tissue samples of flag leaves during the flowering and early grain-filling stages, flowering  
132 spikelets, and developing seeds of the rice cultivars N22, Dular, and Anjali were separately  
133 subjected to principal component analysis (PCA) (Fig. 1). In all cases, we observed separation  
134 between cultivars and among the treatments, which are described in detail below.

135

136

137 *Metabolic profiles change over three days under control conditions during the early grain-*  
138 *filling stage*

139 During early grain filling, samples from plants under control conditions were collected in  
140 parallel to the samples collected from the plots designated for stress treatment, starting from the  
141 final stress time point until 60 h after rewatering. Due to the set-up of the experiments, it was not  
142 possible to obtain similar control samples also during the flowering stage, where we only  
143 collected control samples once during the peak of flowering. The control samples collected  
144 during the early grain-filling stage may thus represent a developmental time series, although we  
145 need to stress that we did not obtain any data independent of the metabolite profiles that allow  
146 the characterization of developmental differences. However, the prediction of metabolic  
147 differences associated with time-dependent development is substantiated by the PCAs that show  
148 shifts along principal component (PC) 1 for the different control samples from flag leaves and  
149 developing seeds (Fig. 1B and D, respectively). In fact, 45 metabolites from flag leaves (Fig. 2)  
150 and 57 metabolites from developing seeds (Fig. 3) showed significant differences between  
151 control samples collected at the final stress time point and at least one of the rewatering time  
152 points in any of the three cultivars. This constitutes 56% and 85% of the metabolites analyzed in  
153 these organs. It should, however, be noted that many of these metabolites only showed  
154 significant differences in content over time in one cultivar and often only at one or two time  
155 points (Fig. 2 and 3). Nevertheless, there was a clear tendency in both organs that the content of  
156 most metabolites decreased over time. These strong differences in metabolite profiles over a  
157 relatively short time span of 60 h under control conditions emphasize the difficulty of defining  
158 the best control time points to compare stress treatments to, as the final conclusions will  
159 obviously be influenced by this choice. In particular when stressed plants exhibit slower

160 development compared with the control plants, even samples taken at the same time point may  
161 not be an ideal choice and there may in fact not be a single “correct” control.

162 In flag leaves 11 metabolites (Asn and the bottom 10 metabolites in Fig. 2) showed a general  
163 decrease in content in all cultivars across the time points, although these reductions were not  
164 always statistically significant. Several other metabolites only showed a reduction in Dular  
165 and/or Anjali at the last sampling time point (60 h; 11% of all 57 significantly changed  
166 metabolites in N22, 36% in Dular, 42% in Anjali). The majority of metabolites in developing  
167 seeds that showed significant changes over time, as grains developed and filled with starch,  
168 exhibited reduced levels in all three cultivars (Fig. 3). Interestingly, in developing seeds many  
169 significant changes in metabolite content, in particular in Dular, were already evident in samples  
170 collected 12 h after the first control samples, when the flag leaf metabolome showed only a few  
171 significant changes (Fig. 2). In addition, at the 60 h sampling time point, 68%, 67% and 49% of  
172 all metabolites that showed a significant change in content across all time points and cultivars  
173 were significantly altered in N22, Dular and Anjali, respectively. From this comparison between  
174 flag leaves and developing seeds we may hypothesize that seeds showed a higher rate of  
175 metabolic change than flag leaves. In particular, the massive reduction in the content of many  
176 amino acids and organic acids could argue for a rapid conversion from metabolically active pools  
177 to a reserve storage. This is in agreement with metabolomic studies in maize [43] and rice [44]  
178 that also found a strong reduction in the levels of many primary metabolites during seed  
179 development.

180

181

182

183 *Effects of rewatering on the metabolome of drought and heat-stressed plants*

184 In our previous report [26], we evaluated the metabolic responses of rice to severe combined  
185 drought and heat stress. Fifty-five stress-responsive metabolites were identified across the three  
186 cultivars in flag leaves at the flowering stage, 51 in flag leaves at the early grain-filling stage, 53  
187 in flowering spikelets, and 28 in developing seeds. Here, we highlight changes of these  
188 metabolites between stressed plants before and after rewatering. Additionally, we compare  
189 metabolite levels after rewatering with levels under fully flooded control conditions to assess to  
190 which extent the plants had recovered from stress.

191

192 *Flag leaves*

193 In flag leaves at both the flowering and early grain-filling stages, PCA revealed that PC1,  
194 which explained 34% of the variance in the data, separated the metabolite profiles of samples  
195 from control and stressed plants, with the samples taken after rewatering located between these  
196 two extremes (Fig. 1A and B). While the metabolite profiles of flag leaves at the flowering stage  
197 collected 12 h after rewatering were still close to the stressed samples, profiles obtained 36 h and  
198 60 h after rewatering were more similar to control conditions, indicating partial metabolic  
199 recovery (Fig. 1A). Flag leaves from the early grain-filling stage 36 and 60 h after rewatering  
200 approached the metabolite composition of control samples collected in parallel to the stress and  
201 12 h rewatering time points (Fig. 1B), also indicating recovery. However, the data also suggest  
202 that the unstressed leaves developed faster, while the drought and heat-stressed leaves suffered a  
203 delay in development and did not reach the metabolic composition of the control samples taken  
204 60 h after rewatering. Moreover, the drought-susceptible cultivar Anjali was separated from the

205 drought-tolerant cultivars N22 and Dular by PC2, which accounted for approximately 24-26% of  
206 the total variance.

207 The metabolic response of flag leaves at the flowering stage to rewatering involved mainly  
208 the reduction of metabolite levels in comparison with levels under severe stress (Fig. 4). Twelve  
209 h after rewatering, only 10 of the 55 stress-responsive metabolites showed significant differences  
210 in their relative levels (Fig. 4A and B). Among seven metabolites with reduced and three with  
211 increased levels, eight showed cultivar-specific responses. After 36 h and 60 h of rewatering,  
212 approximately 60% of the stress-responsive metabolites showed significant differences  
213 compared to their levels under severe stress (Fig. 4C to F). The majority of these metabolites had  
214 lower levels during recovery than under stress and more than half of the metabolites with  
215 reduced levels 60 h after rewatering were common to either all or any two of the cultivars (Fig.  
216 4F). In spite of these changes during recovery, around 60% of all analyzed metabolites were still  
217 significantly different from their control levels at the different rewatering time points (Additional  
218 file 1), indicating incomplete metabolic recovery.

219 Metabolites that showed increased levels in flowering stage flag leaves after rewatering  
220 included primarily organic acids such as citric, isocitric and glyceric acid (Fig. 4G). These  
221 metabolites exhibited reduced levels under severe drought and heat stress, but in spite of the  
222 accumulation during recovery were still significantly lower in some cultivars compared with the  
223 well-watered control samples (Additional file 2). On the other hand, several metabolites that  
224 increased under severe stress were reduced in all cultivars after rewatering, including raffinose,  
225 Glc, Pro, Gly, and N-carboxyglycine (Fig. 4G). Pro was strongly reduced in both drought-  
226 tolerant cultivars (N22 and Dular), but showed an earlier response in the combined drought and

227 heat-tolerant N22. The levels of these metabolites mainly returned to control levels after 60 h of  
228 rewatering (Additional file 2).

229 In flag leaves at the early grain-filling stage, the responses after rewatering were generally  
230 similar to those observed at the flowering stage, with an increasing number of metabolites with  
231 significantly different levels between rewatering and severe stress over time. The majority of  
232 these changes were reductions in metabolite levels (Fig. 5). The responses 12 h after rewatering  
233 were mostly cultivar specific, with the drought and heat-susceptible cultivar Anjali showing the  
234 highest number of significant changes (Fig. 5A and B). N22 and Anjali had also accumulated  
235 some common metabolites 36 h after rewatering, but none of them were in common with Dular  
236 (Fig. 5C). In contrast, among the metabolites that exhibited reduced levels after rewatering, more  
237 than one-third (9 metabolites) were common among all three cultivars at 36 h after rewatering  
238 (Fig. 5D), out of which six were amino acids (Fig. 5G). N22 showed a more similar response  
239 with the equally drought-tolerant Dular 60 h after rewatering than with the susceptible cultivar  
240 Anjali, while there was no exclusive overlap between the heat-susceptible cultivars Dular and  
241 Anjali (Fig. 5E and F). Moreover, metabolic recovery was again only partial, with up to 59% of  
242 all analyzed metabolites having significantly different levels between samples from rewatered  
243 compared to the corresponding well-watered plants (Additional file 3).

244 Similar to the response of flag leaves at the flowering stage, the levels of the TCA cycle  
245 intermediates isocitric and citric acid also increased after rewatering in flag leaves at the early  
246 grain-filling stage, accompanied by a decrease in amino acid and sugar levels (Fig. 5G). In the  
247 case of isocitric acid, the response was exhibited only by N22 and Anjali (Fig. 5G), in contrast to  
248 a general response of all cultivars in flag leaves during flowering (Fig. 4G). Even with this  
249 increase in levels after rewatering from reduced levels during severe stress, the magnitude of

250 change was not sufficient to reach control levels (Additional file 4). Conversely, all cultivars  
251 showed reduced levels of several metabolites, including Ile, Val, raffinose, 2-oxo-glutaric acid,  
252 and Pro in flag leaves during early grain filling, with a cultivar-dependent extent and timing of  
253 change (Fig. 5G). While Pro levels quickly returned to control values during rewatering,  
254 raffinose levels remained higher than the constitutive levels (Additional file 4), similar to the  
255 observation in flag leaves at the flowering stage. Interestingly, the levels of Suc, a well-known  
256 compatible solute that is frequently found accumulated in plants under various stress conditions,  
257 were not increased under severe stress in flag leaves at either developmental stage and also did  
258 not consistently change after rewatering.

259 The only directly comparable metabolomic data obtained using a similar experimental  
260 design was generated from eucalypts, where the accumulation of metabolites, mostly amino  
261 acids, during combined drought and heat stress was reversed during recovery [39], which we  
262 have also observed for most of the stress-induced metabolites. In switchgrass exposed to drought  
263 stress and rewatering, the metabolite profile after 4 h of recovery was not significantly different  
264 from that of the stress condition [45], which is in line with our finding that plants under stress  
265 and 12 h after rewatering have similar metabolic profiles. Meanwhile, the metabolome of  
266 *Arabidopsis* leaves has been investigated after cold acclimation at 4 °C and after a subsequent  
267 shift back to control temperatures (20 °C). Quite strikingly, in this study a similar strong  
268 reduction of the levels of metabolites that were accumulated in the cold was observed [45]. This  
269 reversal of the metabolic stress effect, however, was even stronger and more rapid (within 24 h)  
270 in *Arabidopsis* after the temperature shift than it was in rice after rewatering. This may in part be  
271 due to the fact that a temperature shift can be experimentally performed much more rapidly by  
272 immediate transfer of plants between climate chambers than rewatering a rice field. In addition,

273 and perhaps more importantly, temperature equilibration of *Arabidopsis* plants after the shift was  
274 likely faster than the recovery of water status in rice plants.

275

### 276 *Flowering spikelets*

277 In the PCA (Fig. 1C) the metabolite profiles of flowering spikelets were separated between  
278 rewatering time points and cultivars. This was similar to flag leaves, but the distinction between  
279 cultivars contributed more (31%) to the overall variance than the separation between time points  
280 (21%). In addition, the control, stress and 12 h rewatering samples clustered much more closely  
281 together in N22 than in Dular and Anjali.

282 In total, 77% of the 53 stress-responsive metabolites in flowering spikelets differed  
283 significantly in at least one cultivar during at least one of the rewatering time points compared to  
284 the severe drought and heat treatment. Similar to what we described for flag leaves above, most  
285 of these metabolites showed significantly reduced levels (Fig. 6). Twelve h after rewatering, 24  
286 metabolites showed a decrease in Dular and/or Anjali, while only four metabolites responded in  
287 N22 (Fig. 6B). N22 had two common metabolic responses each with one of the other cultivars,  
288 while Dular and Anjali had nine metabolites in common, of which most were amino acids (Fig.  
289 6G). Conversely, the six metabolites that showed increased levels 12 h after rewatering were all  
290 cultivar specific (Fig. 6A) and the same was true for the two metabolites with increased levels 60  
291 h after rewatering (Fig. 6 E). At 36 and 60 h after rewatering, the number of metabolites with  
292 significantly changed levels that were common between all three cultivars increased to eight  
293 (Fig. 6D) and nine (Fig. 6F), respectively. In addition to ribitol, which was already common  
294 between all cultivars 12 h after rewatering, seven amino acids exhibited lower levels relative to  
295 the stressed condition after 36 h. After 60 h the unidentified metabolite A170001 was in addition



296 commonly reduced in all cultivars. Five of these amino acids, namely Gly, Ile, Leu, Tyr, and  
297 Val, already had reduced levels 12 h after rewatering in the combined drought and heat-  
298 susceptible cultivars Dular and Anjali (Fig. 6G). Nevertheless, only about 30% of the 88  
299 metabolites analyzed in flowering spikelets had reverted back to control levels after rewatering  
300 (Additional file 5), indicating incomplete metabolic recovery also in flowering spikelets  
301 (Additional file 6).

302

### 303 *Developing seeds*

304 In the PCA of the metabolite profiles of developing seeds (Fig. 1D), PC1 (43% of the total  
305 variance) separated the developing seed samples according to the time after rewatering, while  
306 PC2 (25% of the total variance) separated metabolite profiles of Dular from N22 and Anjali.  
307 Interestingly, there was no clear separation between samples from plants that were grown under  
308 control conditions at the different time points and samples from plants that had experienced  
309 severe drought and heat stress and rewatering.

310 Among the investigated organs, developing seeds had shown the smallest number of  
311 metabolites with significantly altered levels under severe stress conditions [26]. Consequently,  
312 the number of metabolites that were significantly influenced by rewatering compared to the  
313 stressed state was also quite low (Fig. 7). We only observed one, four and two metabolites that  
314 showed an increase 12 h, 36 h, and 60 h after rewatering (Fig. 7A, C, E) and only raffinose  
315 content in Anjali was increased at all time points (Fig. 7G). However, it was also increased in  
316 N22 and Dular at the later time points. This typical stress-induced osmolyte was specifically  
317 further accumulated after rewatering in developing seeds, while it was massively reduced after

318 rewatering in flag leaves. However, this may be a developmental effect, as raffinose accumulates  
319 in rice during seed development, independent of stress effects [46].

320 The number of metabolites in developing seeds that showed significantly lower levels than  
321 under stress increased over time after rewatering from six to 14 and 20 after 12 h, 36 h and 60 h  
322 (Fig. 7B, D, F, G), similar to the response of flag leaves and flowering spikelets. This  
323 corresponded to a time-dependent decrease in the number of metabolites whose levels were  
324 significantly different from constitutive levels (Additional file 7). The decrease in the levels of  
325 Ile and Thr in developing seeds 12 h after rewatering relative to the levels under stress resulted in  
326 relative concentrations similar to those under control conditions in all cultivars at this time point  
327 (Additional file 8). The further reduction after 36 h led to significantly lower Ile and Thr content  
328 than in the control samples in N22 and Anjali. However, these levels increased again and  
329 approached the control values 60 h after rewatering.

330

### 331 ***Correlations between metabolite composition after rewatering and grain yield and quality***

332 We have previously identified potential marker metabolites for tolerance to combined  
333 drought and heat stress expressed as the stability of grain yield and quality under stress [26].  
334 These markers were identified from the metabolomes of the three cultivars under control and  
335 severe stress conditions. Here, we identified additional metabolite marker candidates from the  
336 metabolomes of the three rice cultivars after rewatering. We tested the correlation between  
337 changes in metabolite levels before (severe stress) and after rewatering, and the stress-induced  
338 reduction in grain yield and increase in proportion of chalky grains (i.e. percentage of grains with  
339 >50% chalk content). To determine the magnitude of metabolic changes we compared metabolite  
340 content between stressed plants and plants 60 h after rewatering as an indirect measure of the

341 speed of metabolic recovery from stress. A positive correlation from this analysis indicates that  
342 larger changes in the content of a metabolite during rewatering are associated with either a  
343 smaller yield reduction or a larger increase in the fraction of chalky grains.

344

345 *Correlations between changes in metabolite levels after rewatering and yield reduction under*  
346 *stress*

347 The correlation analysis between changes in metabolite levels after rewatering and the  
348 drought and heat stress-induced reduction in yield identified 28 metabolites with significant  
349 correlations (Table 1). Most of the metabolites exhibited a positive correlation, indicating that  
350 these metabolites had larger changes in levels after rewatering when stress-induced yield loss  
351 was smaller. On the other hand, nine metabolites yielded negative correlations, of which all  
352 except A180002 were observed in flag leaves collected during the early grain-filling stage and in  
353 developing seeds. Only erythronic acid and the unknown A147011 showed significant  
354 correlations for both sink organs (flowering spikelets and developing seeds), while there were no  
355 metabolites that showed significant correlations in flag leaves at both developmental stages.  
356 Isocitric acid was common between flag leaves at the flowering stage and developing seeds,  
357 while phosphoric acid was common in flag leaves at the early grain-filling stage and flowering  
358 spikelets. In both cases the metabolites showed opposite directions of the correlations in the  
359 source and sink organs. Aside from these, all other metabolites were unique to a specific organ at  
360 a specific developmental stage. The highest number of significant correlations was detected for  
361 metabolites in developing seeds (15 metabolites) and the lowest in flag leaves at the flowering  
362 stage (3 metabolites). Flag leaves at the early grain-filling stage and flowering spikelets each had  
363 seven metabolites with significant correlations.

364 Of these 28 metabolites, 17 were also identified in our previous analysis, where we used  
365 metabolite changes under stress and constitutive metabolite content for correlation with yield  
366 reduction [26]. Interestingly, there were six metabolites that were identified in the same organ in  
367 both studies: glycerophosphoglycerol in flag leaves at the flowering stage from the change in  
368 level under severe stress and after rewatering; dehydroascorbic acid dimer in flag leaves at the  
369 early grain-filling stage from the constitutive metabolite levels and the rewatering response;  
370 malic acid in flag leaves at the early grain-filling stage under severe stress and after rewatering;  
371 erythronic acid in flowering spikelets under severe stress and after rewatering; isocitric acid in  
372 developing seeds under severe stress and after rewatering; and pyruvic acid in developing seeds  
373 under severe stress and after rewatering. In addition, erythronic and threonic acid were each  
374 identified in a total of five different organs/treatments, and isocitric, phosphoric and gluconic  
375 acid in four different organs/treatments. We hypothesize that these metabolites are particularly  
376 promising candidates as markers to select for yield stability under combined drought and heat  
377 stress. Obviously, his hypothesis needs further testing with a larger panel of genotypes.

378

379 *Correlations between changes in metabolite levels after rewatering and the increase in the*  
380 *proportion of chalky grains under stress*

381 Only six metabolites showed significant correlations between their changes 60 h after  
382 rewatering and the increase in the proportion of chalky grains under stress (Table 2). Five of  
383 these metabolites showed significant correlations in flag leaves, and one in developing seeds.  
384 Four of the metabolites identified in flag leaves showed negative correlations  
385 (glycerophosphoglycerol, sucrose, A137012, A170001), indicating that larger changes after  
386 rewatering were associated with smaller increases in the fraction of chalky grains, i.e. higher

387 tolerance to combined drought and heat stress. The other two metabolites showed positive  
 388 correlations either in flag leaves (*trans*-sinapic acid) or in developing seeds (arabitol). Only  
 389 arabitol showed an overlap with the marker metabolite candidates for seed quality stability under  
 390 combined drought and heat stress that were identified in our previous investigation, however, in  
 391 a different organ and treatment [26].

392  
 393 **Table 1. Correlation between yield reduction and changes in metabolite levels.** Metabolites  
 394 with significant correlations (Spearman’s rank correlation,  $P < 0.05$ ) between stress-induced  
 395 yield reduction and the changes in metabolite levels (expressed as log<sub>2</sub>-fold change) 60 h after  
 396 rewatering relative to severe stress are shown together with the corresponding correlation  
 397 coefficients. The analysis was performed for metabolites from flag leaves collected during the  
 398 flowering and early grain-filling stages, flowering spikelets and developing seeds. Metabolites in  
 399 bold font are common between the two sink organs. Metabolites are sorted alphabetically.

400

| <b>Organ/<br/>Developmental stage</b> | <b>Metabolite</b>          | <b>Correlation coefficient</b> |
|---------------------------------------|----------------------------|--------------------------------|
| Flag leaves                           | Glycerophosphoglycerol     | 0.72                           |
| Flowering stage                       | Isocitric acid             | 0.77                           |
|                                       | Ribitol                    | 0.72                           |
| Flag leaves                           | A116014                    | 0.80                           |
| Early grain-filling stage             | A214004                    | 0.83                           |
|                                       | Dehydroascorbic acid dimer | 0.87                           |
|                                       | Glyceric acid              | -0.75                          |
|                                       | Glycine                    | -0.88                          |
|                                       | Malic acid                 | -0.83                          |
|                                       | Phosphoric acid            | -0.78                          |
| Flowering spikelets                   | <b>A147011</b>             | <b>0.73</b>                    |
|                                       | A180002                    | -0.78                          |
|                                       | Arbutin                    | 0.82                           |
|                                       | Aspartic acid              | 0.72                           |
|                                       | <b>Erythronic acid</b>     | <b>0.73</b>                    |
|                                       | Galactonic acid            | 0.73                           |
|                                       | Phosphoric acid            | 0.77                           |
| Developing seeds                      | <b>A147011</b>             | <b>0.77</b>                    |

|  |                                |             |
|--|--------------------------------|-------------|
|  | A203003                        | 0.73        |
|  | A311002                        | 0.72        |
|  | <b>Erythronic acid</b>         | <b>0.70</b> |
|  | Fructose                       | 0.77        |
|  | Gluconic acid                  | 0.70        |
|  | Glucose                        | 0.77        |
|  | <i>myo</i> -Inositol-phosphate | 0.70        |
|  | Isocitric acid                 | -0.72       |
|  | Kestose, 1-                    | 0.80        |
|  | N-Carboxyglycine               | 0.83        |
|  | Pyridine, 2-hydroxy-           | -0.75       |
|  | Pyridine, 3-hydroxy-           | -0.73       |
|  | Pyruvic acid                   | -0.92       |
|  | Threonic acid                  | 0.73        |

401  
402

403 **Table 2. Correlation between increase in the fraction of chalky grains and changes in**  
404 **metabolite levels.** Metabolites with significant correlations (Spearman's rank correlation,  $P <$   
405 0.05) between stress-induced increase in the proportion of chalky grains and the changes in  
406 metabolite levels (expressed as log<sub>2</sub>-fold change) 60 h after rewatering relative to severe stress  
407 are shown together with the corresponding correlation coefficients. The analysis was performed  
408 for metabolites from flag leaves collected during the flowering and early grain-filling stages,  
409 flowering spikelets and developing seeds. However, no metabolite showed significant correlation  
410 in flowering spikelets. Metabolites are sorted alphabetically.

411

| <b>Organ/<br/>Developmental stage</b> | <b>Metabolite</b>          | <b>Correlation coefficient</b> |
|---------------------------------------|----------------------------|--------------------------------|
| Flag leaves                           | Glycerophosphoglycerol     | -0.80                          |
| Flowering stage                       | <i>trans</i> -Sinapic acid | 0.78                           |
|                                       | Sucrose                    | -0.70                          |
| Flag leaves                           | A137012                    | -0.70                          |
| Early grain-filling stage             | A170001                    | -0.75                          |
| Developing seeds                      | Arabitol                   | 0.78                           |

412

413

414 **Potential implications**

415 Our analysis showed that under well-watered control conditions significant metabolic  
416 changes occurred over a period of only three days. These changes were particularly pronounced  
417 in developing seeds, while the metabolome of flag leaves was much more stable. This implies  
418 that the choice of reference point to determine metabolic changes due to different treatments can  
419 significantly influence the final results and interpretations, and that the effect of this choice will  
420 even depend on the investigated organ. Since development, and therefore changes in metabolites  
421 that are unrelated to stress effects, may occur at a different rate under stressed compared to non-  
422 stressed conditions, it may be virtually impossible to determine a single “absolutely correct” time  
423 point to use as the control. We suggest that the only solution to this problem is a cautious and  
424 very careful interpretation of such data, taking into account developmental changes in metabolite  
425 levels of the organ of interest.

426 Secondly, our data suggest that while many stress-responsive metabolites returned to  
427 (almost) control levels within three days after stress relief, this was clearly not true for all such  
428 metabolites. While this may in part be due to the additional developmental effects on metabolites  
429 as discussed above, these persistent metabolic changes are a sign of metabolic imprinting [48].  
430 Metabolic imprints may lead to a modified stress response under a recurrent stress situation.  
431 Such phenomena have been defined in the recent literature as stress memory (see [49] for a  
432 review). While the current study did not investigate stress memory effects, this aspect clearly  
433 warrants further research, also in the light of the predicted increase in erratic weather patterns  
434 due to global climate change.

435

436

437 **Methods**

438 *Experimental setup*

439 Crop husbandry and treatment imposition were performed as described in our previous  
440 report [25]. Three rice (*Oryza sativa* L.) cultivars were grown in the field at the International  
441 Rice Research Institute (IRRI), Philippines during the dry seasons of three consecutive years  
442 (2013 – 2015). The cultivars N22 (*aus* ssp.; drought, heat and combined drought and heat  
443 tolerant), Dular (*aus* ssp.; drought tolerant, heat and combined drought and heat susceptible), and  
444 Anjali (*indica* ssp.; drought, heat, and combined drought and heat susceptible), which were  
445 selected based on their differential responses to independent or combined drought and heat stress  
446 during the reproductive stage [23,50–52] were used in these experiments. Plants were staggered-  
447 sown in separate plots allocated for drought imposition during flowering and early grain filling.  
448 This planting approach allowed for the two developmental stages to occur simultaneously in the  
449 three cultivars during late April to early May, which is the hottest period at IRRI. Consequently,  
450 the three-day rewatering period that we monitored occurred in early- to mid-May, which  
451 recorded an average maximum ambient air temperature of  $33.8 \pm 0.83$  °C across the three years,  
452 compared with  $34.3 \pm 0.50$  °C during the stress period. On the last day of the drought stress  
453 treatment, when the soil water potential had reached an average of  $-46.6 \pm 11.1$  kPa across all  
454 experiments [25], the drought-stressed plots were rewatered starting at 18:00. It took ~3 h until  
455 the plots were fully irrigated and they were subsequently kept fully flooded until harvest. In  
456 parallel, control plots were kept fully flooded throughout the experiment. It should be pointed out  
457 that a true control, i.e. growth under well-watered conditions with lower air temperatures, was  
458 not possible to include in this type of field experiment.

459



460 *Sample collection*

461 Flag leaves, flowering spikelets, and developing seeds were collected in three to five  
462 replicates per cultivar from control plots, at the end of the drought stress period and during the  
463 first three days of rewatering. The sampling time was between 9:00 – 11:30 to avoid the effects  
464 of circadian rhythms on metabolite content. Since the plots were fully flooded at ~21:00 on the  
465 day of irrigation after the drought treatment, the collection of samples during the first rewatering  
466 time point (i.e. on the following day) corresponded to 12 h of rewatering. The subsequent time  
467 points, which were on consecutive days, were thus at 36 h and 60 h after rewatering.

468 Spikelets flowering at the time of sampling, as well as flag leaves at that developmental  
469 stage, were collected from the flowering stage drought-stress plots. The samples from stressed  
470 plants were the same as those denoted “severe stress” in our previous report [26]. It should be  
471 noted that most of the spikelets were from panicles trapped within the flag leaf sheath during the  
472 drought stress treatment and were just exerted upon rewatering. The corresponding control  
473 samples for flowering spikelets and flag leaves at the flowering stage were collected only once  
474 from the control plot and were the same samples as described previously [26]. Developing seeds,  
475 which were marked as flowering spikelets during the first few days of drought stress (see [26] for  
476 details), were collected from both the corresponding control and stress plots at every rewatering  
477 time point. The developing seeds were collected 10-12 days after flowering (DAF), 11-13 DAF,  
478 and 12-14 DAF for the 12 h, 36 h, and 60 h rewatering time points, respectively, across the three  
479 experiments. In addition, flag leaves from tillers with panicles at the grain-filling stage were  
480 collected from the control and early grain-filling stage drought-stress plots. Further details of the  
481 sample collection have been described previously [26].

482

483 *Metabolite profiling and data processing*

484 Metabolite profiling and data processing was performed as reported by Lawas et al. [26]. A  
485 fraction enriched in small primary and secondary metabolites was extracted from liquid nitrogen  
486 quenched ground tissue samples and was analyzed by gas chromatography coupled to electron  
487 impact ionization-time of flight-mass spectrometry (GC/EI-TOF-MS) as previously described  
488 [53]. The mass spectral intensities of identified metabolites were normalized to sample fresh  
489 weight and  $^{13}\text{C}_6$ -sorbitol as internal standard. All metabolomics data are freely available [41, 54]

490

491 *Statistical analysis*

492 Statistical analyses were executed using R version 3.4.0 [55] and RStudio version 1.0.153  
493 [56]. Data pre-processing (handling of missing values, normalization to remove effects of  
494 measurement batch and sequence, outlier detection, normalization and transformation) prior to  
495 the main statistical analyses were the same as in our previous report [26], where we emphasized  
496 that all data pre-processing was performed including all samples collected during the stress and  
497 rewatering time points to enable direct comparisons. Pre-processed data from the three  
498 experiments were combined into one data set for each organ per developmental stage (flag leaves  
499 at the flowering stage, flag leaves at the early grain-filling stage, flowering spikelets, developing  
500 seeds). Mean values of samples collected during the control, stress, and rewatering time points  
501 were Pareto-scaled and mean-centered, and subjected to PCA using the probabilistic method  
502 from the *'pcaMethods'* package (version 1.60.0) [57]. Scores obtained from the PCA were  
503 plotted using the *'ggplot2'* package (version 2.2.1). Differences between metabolite levels of flag  
504 leaves collected during the early grain-filling stage and of developing seeds obtained at different  
505 time points under fully flooded control conditions were assessed by comparing the relative

506 metabolite levels (median-normalized and log<sub>2</sub>-transformed values) of control samples collected  
507 during each of the rewatering time points to the control samples collected in parallel to the stress  
508 time point (rewatering time points 0 h to 60 h). In addition, we compared the relative levels of  
509 metabolites that were significantly responsive to severe stress [26] before and after rewatering in  
510 each of the organs. The relative metabolite levels during rewatering were also compared to the  
511 relative metabolite levels under control conditions to evaluate how far the stress effects were  
512 reversed. In this case, all metabolites (i.e. not only the stress-responsive metabolites) were  
513 included in the analysis. All comparisons were performed using the Wilcoxon-Mann-Whitney  
514 test after assessing the normality of the data by the Shapiro-Wilk test (R package ‘*stats*’, version  
515 3.4.0). Metabolites that showed significant differences in the comparisons were plotted in Venn  
516 diagrams (‘*VennDiagram*’ package, version 1.6.17) and in heat maps with hierarchical clustering  
517 using Euclidean distance and average linkage (‘*gplots*’ package, version 3.0.1). Correlation  
518 analysis between the stress-induced changes in grain yield and quality (measured in terms of the  
519 proportion of “chalky grains”, i.e. grains with >50% chalk content) and in the change in  
520 metabolite levels between the 60 h rewatering and the stress time points was performed using the  
521 Spearman’s rank method (R package ‘*stats*’). Data on grain yield and quality from our previous  
522 report [25] was used. Pre-processed metabolite data was median-normalized and log<sub>2</sub>-  
523 transformed per experiment. A total of nine values (three cultivars x three years) were used for  
524 the correlation tests. All code used in these analyses is freely available [58].

525

### 526 **Availability of supporting data and materials**

527 The data set supporting the results of this article is available in the EMBL-EBI MetaboLights  
528 database (DOI: 10.1093/nar/gks1004; PubMed PMID: 23109552) with the identifier

529 MTBLS801. Snapshots of our code and other data supporting this research are available in the  
530 *GigaScience* repository, GigaDB [41].

531

### 532 **Availability of source code and requirements**

533 Project name: Rice\_HxD\_Recovery\_Metabolomics

534 Project home page: GitHub ([https://github.com/llawas/Rice\\_HxD\\_Recovery\\_Metabolomics](https://github.com/llawas/Rice_HxD_Recovery_Metabolomics))

535 Operating system: Windows 7

536 Programming language: R

537 License: GNU General Public License

538 RRID: SCR\_017204

539

### 540 **Abbreviations**

541 DAF: days after flowering; GC-MS: gas chromatography-mass spectrometry; Glc: glucose;

542 PCA: principal component analysis; Suc: sucrose; TCA cycle: tricarboxylic acid cycle

543

### 544 **Acknowledgements**

545 LMFL gratefully acknowledges support by a PhD fellowship from the University of Potsdam,

546 Germany. We thank Dr. Xia Li (present address: Institute of Subtropical Agriculture, Chinese

547 Academy of Science, Changsha, Hunan, 410125, China) for help with sampling.

548

### 549 **Funding**

550 This project has been supported by grants from the German Federal Ministry for Economic

551 Cooperation and Development [Project Number 11.7860.7-001.00; Contract Numbers 81141844

552 and 81170348] to SVKJ and by the Max-Planck Society to JK and DKH. The funding bodies had  
553 no role in study design, data collection, analysis or interpretation, or in writing the manuscript.

554

#### 555 **Authors' contributions**

556 SVKJ and DKH conceived the project. SVKJ and LMFL organized the field experiments, LMFL  
557 performed the sampling. AE and JK performed the metabolomic analysis and metabolite  
558 annotation. LMFL performed the data analysis with contributions from EZ and DKH. LMFL and  
559 DKH wrote the manuscript with contributions from all co-authors.

560

#### 561 **Competing interests**

562 The authors declare that they have no financial or non-financial competing interests.

563

#### 564 **References**

- 565 1. Lesk C, Rowhani P, Ramankutty N. Influence of extreme weather disasters on global crop  
566 production. *Nature*. 2016;529:84–7.
- 567 2. Hatfield JL, Boote KJ, Kimball BA, Ziska LH, Izaurralde RC, Ort D, et al. Climate impacts on  
568 agriculture: Implications for crop production. *Agron J*. 2011;103:351–70.
- 569 3. Coumou D, Rahmstorf S. A decade of weather extremes. *Nat Clim Chang*. 2012;2:491–6.
- 570 4. IPCC. Climate Change 2014: Synthesis Report. Contribution of Working Groups I, II and III  
571 to the Fifth Assessment Report of the Intergovernmental Panel on Climate Change. Core Writing  
572 Team, Pachauri RK, Meyer LA, editors. Geneva, Switzerland: Cambridge University Press;  
573 2014.

- 574 5. Dunn RJH, Stanitski DM, Gobron N, Willett KM, editors. Global Climate State 2017. Bulletin  
575 of the American Meteorological Society; 2018. p. S5–68.
- 576 6. Battisti DS, Naylor RL. Historical warnings of future food insecurity with unprecedented  
577 seasonal heat. *Science*. 2009;323:240–4.
- 578 7. Touma D, Ashfaq M, Nayak MA, Kao S-C, Diffenbaugh NS. A multi-model and multi-index  
579 evaluation of drought characteristics in the 21st century. *J Hydrol*. 2015;526:196–207.
- 580 8. Lobell DB, Gourdji SM. The influence of climate change on global crop productivity. *Plant*  
581 *Physiol*. 2012;160:1686–97.
- 582 9. Madadgar S, AghaKouchak A, Farahmand A, Davis SJ. Probabilistic estimates of drought  
583 impacts on agricultural production. *Geophys Res Lett*. 2017;44:7799–807.
- 584 10. Zhao C, Liu B, Piao S, Wang X, Lobell DB, Huang Y, et al. Temperature increase reduces  
585 global yields of major crops in four independent estimates. *Proc Natl Acad Sci USA*.  
586 2017;114:9326–31.
- 587 11. Li Y, Ye W, Wang M, Yan X. Climate change and drought: a risk assessment of crop-yield  
588 impacts. *Clim Res*. 2009;39:31–46.
- 589 12. Hasegawa T, Ishimaru T, Kondo M, Kuwagata T, Yoshimoto M, Fukuoka M. Spikelet  
590 sterility of rice observed in the record hot summer of 2007 and the factors associated with its  
591 variation. *J Agric Meteorol*. 2011;67:225–32.
- 592 13. Pandey S, Bhandari H, Ding S, Prapertchob P, Sharan R, Naik D, et al. Coping with drought  
593 in rice farming in Asia: Insights from a cross-country comparative study. *Agric Econ*.  
594 2007;37:213–24.
- 595 14. GRiSP (Global Rice Science Partnership). Rice almanac. 4th ed. Los Baños (Philippines):  
596 International Rice Research Institute; 2013.

- 597 15. Jagadish SVK, Muthurajan R, Oane R, Wheeler TR, Heuer S, Bennett J, et al. Physiological  
598 and proteomic approaches to address heat tolerance during anthesis in rice (*Oryza sativa* L.). *J*  
599 *Exp Bot.* 2010;61:143–56.
- 600 16. Shi W, Lawas LMF, Raju BR, Jagadish SVK. Acquired thermo-tolerance and trans-  
601 generational heat stress response at flowering in rice. *J Agron Crop Sci.* 2016;202:309–19.
- 602 17. Shi W, Li X, Schmidt RC, Struik PC, Yin X, Jagadish SVK. Pollen germination and in vivo  
603 fertilization in response to high-temperature during flowering in hybrid and inbred rice. *Plant*  
604 *Cell Environ.* 2018;41:1287–97.
- 605 18. Suriyasak C, Harano K, Tanamachi K, Matsuo K, Tamada A, Iwaya-Inoue M, et al. Reactive  
606 oxygen species induced by heat stress during grain filling of rice (*Oryza sativa* L.) are involved  
607 in occurrence of grain chalkiness. *J Plant Physiol.* 2017;216:52–7.
- 608 19. Kadam NN, Struik PC, Rebolledo MC, Yin X, Jagadish SVK. Genome-wide association  
609 reveals novel genomic loci controlling rice grain yield and its component traits under water-  
610 deficit stress during the reproductive stage. *J Exp Bot.* 2018;69:4017–32.
- 611 20. Gowda VRP, Henry A, Vadez V, Shashidhar HE, Serraj R. Water uptake dynamics under  
612 progressive drought stress in diverse accessions of the OryzaSNP panel of rice (*Oryza sativa*).  
613 *Funct Plant Biol.* 2012;39:402–11.
- 614 21. Pantuwan G, Fukai S, Cooper M, Rajataserreekul S, O’Toole JC. Yield response of rice  
615 (*Oryza sativa* L.) genotypes to different types of drought under rainfed lowlands. Part 1. Grain  
616 yield and yield components. *Field Crop Res.* 2002;73:153–68.
- 617 22. Jagadish SVK, Muthurajan R, Rang ZW, Malo R, Heuer S, Bennett J, et al. Spikelet  
618 proteomic response to combined water deficit and heat stress in rice (*Oryza sativa* cv. N22).  
619 *Rice.* 2011;4:1–11.

620 23. Rang ZW, Jagadish SVK, Zhou QM, Craufurd PQ, Heuer S. Effect of high temperature and  
621 water stress on pollen germination and spikelet fertility in rice. *Environ Exp Bot.* 2011;70:58–65.

622 24. Li X, Lawas LMF, Malo R, Glaubitz U, Erban A, Mauleon R, et al. Metabolic and  
623 transcriptomic signatures of rice floral organs reveal sugar starvation as a factor in reproductive  
624 failure under heat and drought stress. *Plant Cell Environ.* 2015;38:2171–92.

625 25. Lawas LMF, Shi W, Yoshimoto M, Hasegawa T, Hinch DK, Zuther E, et al. Combined  
626 drought and heat stress impact during flowering and grain filling in contrasting rice cultivars  
627 grown under field conditions. *Field Crop Res.* 2018;229:66–77.

628 26. Lawas LMF, Erban A, Kopka J, Jagadish SVK, Zuther E, Hinch DK. Metabolic responses  
629 of rice cultivars with different tolerance to combined drought and heat stress under field  
630 conditions. *GigaScience.* 2019;8:1-21 (DOI: 10.1093/gigascience/giz050).

631 27. Mahalingam R. Consideration of Combined Stress: A Crucial Paradigm for Improving  
632 Multiple Stress Tolerance in Plants. In: Mahalingam R, editor. *Combined Stress in Plants:  
633 Physiological, Molecular and Biochemical Aspects.* Cham: Springer International Publishing;  
634 2015. p. 1–25.

635 28. Lawas LMF, Zuther E, Jagadish SVK, Hinch DK. Molecular mechanisms of combined heat  
636 and drought stress resilience in cereals. *Curr Opin Plant Biol.* 2018;45:212–7.

637 29. Mittler R. Abiotic stress, the field environment and stress combination. *Trends Plant Sci.*  
638 2006;11:15–9.

639 30. Crisp PA, Ganguly D, Eichten SR, Borevitz JO, Pogson BJ. Reconsidering plant memory:  
640 Intersections between stress recovery, RNA turnover, and epigenetics. *Sci Adv.*  
641 2016;2:e1501340.



642 31. Yeung E, van Veen H, Vashisht D, Sobral Paiva AL, Hummel M, Rankenberg T, et al. A  
643 stress recovery signaling network for enhanced flooding tolerance in *Arabidopsis thaliana*. Proc  
644 Natl Acad Sci USA. 2018;115:E6085–94.

645 32. Chen D, Wang S, Cao B, Cao D, Leng G, Li H, et al. Genotypic variation in growth and  
646 physiological response to drought stress and re-watering reveals the critical role of recovery in  
647 drought adaptation in maize seedlings. Front Plant Sci. 2016;6:1241.

648 33. Xu Z, Zhou G, Shimizu H. Plant responses to drought and rewatering. Plant Signal Behav.  
649 2010;5:649–54.

650 34. Sailaja B, Anjum N, Vishnu Prasanth V, Sarla N, Subrahmanyam D, Voleti SR, et al.  
651 Comparative study of susceptible and tolerant genotype reveals efficient recovery and root  
652 system contributes to heat stress tolerance in rice. Plant Mol Biol Report. 2014;32:1228–40.

653 35. Sarkar NK, Kim YK, Grover A. Coexpression network analysis associated with call of rice  
654 seedlings for encountering heat stress. Plant Mol Biol. 2014;84:125–43.

655 36. Muthurajan R, Shobbar ZS, Jagadish SVK, Bruskiwich R, Ismail A, Leung H, et al.  
656 Physiological and proteomic responses of rice peduncles to drought stress. Mol Biotechnol.  
657 2011;48:173–82.

658 37. Liu J-X, Bennett J. Reversible and irreversible drought-induced changes in the anther  
659 proteome of rice (*Oryza sativa* L.) genotypes IR64 and Moroberekan. Mol Plant. 2011;4:59–69.

660 38. Salekdeh GH, Siopongco J, Wade LJ, Ghareyazie B, Bennett J. Proteomic analysis of rice  
661 leaves during drought stress and recovery. Proteomics. 2002;2:1131–45.

662 39. Correia B, Hancock RD, Amaral J, Gomez-Cadenas A, Valledor L, Pinto G. Combined  
663 drought and heat activates protective responses in *Eucalyptus globulus* that are not activated  
664 when subjected to drought or heat stress alone. Front Plant Sci. 2018;9:819.

665 40. Zhou R, Kong L, Wu Z, Rosenqvist E, Wang Y, Zhao L, et al. Physiological response of  
666 tomatoes at drought, heat and their combination followed by recovery. *Physiol Plant*.  
667 2019;165:144-54.

668 41. MetaboLights Database. <https://www.ebi.ac.uk/metabolights/>. Accessed 14 March 2019.

669 42. Lawas LMF, Li X, Erban A, Kopka J, Jagadish SVK, Zuther E, et al. Supporting data for  
670 “Metabolic responses of rice cultivars with different tolerance to combined drought and heat  
671 stress under field conditions.” GigaScience Database. 2019; <http://dx.doi.org/10.5524/100582>.

672 43. Hu C, Li Q, Shen X, Quan S, Lin H, Duan L, et al. Characterization of factors underlying the  
673 metabolic shifts in developing kernels of colored maize. *Sci Rep*. 2016;6:35479.

674 44. Hu C, Tohge T, Chan SA, Song Y, Rao J, Cui B, et al. Identification of conserved and  
675 diverse metabolic shifts during rice grain development. *Sci Rep*. 2016;6:20942.

676 45. Meyer E, Aspinwall MJ, Lowry DB, Palacio-Mejía JD, Logan TL, Fay PA, et al. Integrating  
677 transcriptional, metabolomic, and physiological responses to drought stress and recovery in  
678 switchgrass (*Panicum virgatum* L.). *BMC Genomics*. 2014;15:527.

679 46. Pagter M, Alpers J, Erban A, Kopka J, Zuther E, Hinch DK. Rapid transcriptional and  
680 metabolic regulation of the deacclimation process in cold acclimated *Arabidopsis thaliana*. *BMC*  
681 *Genomics*. 2017;18:731.

682 47. Yan S, Huang W, Gao J, Fu H, Liu J. Comparative metabolomic analysis of seed metabolites  
683 associated with seed storability in rice (*Oryza sativa* L.) during natural aging. *Plant Physiol*  
684 *Biochem*. 2018;127:590–8.

685 48. Schwachtje J, Whitcomb SJ, Firmino AAP, Zuther E, Hinch DK, Kopka J. Induced,  
686 imprinted, and primed responses to changing environments: Does metabolism store and process  
687 information? *Front Plant Sci*. 2019;10:106.

688 49. Hilker M, Schwachtje J, Baier M, Balazadeh S, Bäumle I, Geiselhardt S, et al. Priming and  
689 memory of stress responses in organisms lacking a nervous system. *Biol Rev.* 2016;91:1118–33.

690 50. Henry A, Gowda VRP, Torres RO, McNally KL, Serraj R. Variation in root system  
691 architecture and drought response in rice (*Oryza sativa*): Phenotyping of the OryzaSNP panel in  
692 rainfed lowland fields. *Field Crop Res.* 2011;120:205–14.

693 51. Kumar A, Dixit S, Ram T, Yadaw RB, Mishra KK, Mandal NP. Breeding high-yielding  
694 drought-tolerant rice: genetic variations and conventional and molecular approaches. *J Exp Bot.*  
695 2014;65:6265–78.

696 52. Tenorio FA, Ye C, Redoña E, Sierra S, Laza M, Argayoso MA. Screening rice genetic  
697 resources for heat tolerance. *SABRAO J Breed Genet.* 2013;45:371–81.

698 53. Erban A, Schauer N, Fernie AR, Kopka J. Nonsupervised Construction and Application of  
699 Mass Spectral and Retention Time Index Libraries From Time-of-Flight Gas Chromatography-  
700 Mass Spectrometry Metabolite Profiles. In: Weckwerth W, editor. *Meth Mol Biol.* Totowa, NJ:  
701 Humana Press Inc.; 2007. p. 19–39.

702 54. Haug K, Salek RM, Conesa P, et al. MetaboLights-an open-access general purpose repository  
703 for metabolomics studies and associated meta-data. *Nucleic Acids Res* 2013;41(Database  
704 issue):D781-6.

705 55. R Core Team. *R: A language and environment for statistical computing.* Vienna, Austria: R  
706 Foundation for Statistical Computing; 2017. <https://www.r-project.org/>. Accessed 14 March  
707 2019.

708 55. RStudio Team. *RStudio: Integrated Development Environment for R.* Boston, MA: RStudio,  
709 Inc.; 2016. <https://www.rstudio.com/>. Accessed 14 March 2019.

710 57. Stacklies W, Redestig H, Scholz M, Walther D, Selbig J. pcaMethods - A bioconductor  
711 package providing PCA methods for incomplete data. *Bioinformatics*. 2007;23:1164–7.

712 58. Rice\_HxD\_Recovery\_Metabolomics Project page.  
713 [https://github.com/lawas/Rice\\_HxD\\_Recovery\\_Metabolomics\\_Recovery](https://github.com/lawas/Rice_HxD_Recovery_Metabolomics_Recovery).

714

715

## 716 **Figure legends**

### 717 **Figure 1. Principal component analysis (PCA) of rice metabolite profiles**

718 Scores of the first two principal components (PC1 and PC2) from PCA of the metabolite profiles  
719 of flag leaves at the flowering stage (A), flag leaves at the early grain-filling stage (B), flowering  
720 spikelets (C), and developing seeds (D) collected under control and severe stress conditions, and  
721 12, 36, and 60 h after rewatering. Samples were collected from the cultivars N22, Dular, and  
722 Anjali in three experiments (n = 12 – 15 per organ per condition). Scores shown are averages of  
723 the median-normalized and log<sub>10</sub>-transformed values of 81, 88, and 67 metabolites in flag leaves,  
724 flowering spikelets, and developing seeds, respectively, that were detected in common across the  
725 three experiments.

726

### 727 **Figure 2. Constitutive levels of metabolites in flag leaves during the early grain-filling stage**

728 Flag leaves were collected from three rice cultivars under well-watered control conditions in  
729 parallel to collection of samples from plants exposed to severe stress and 12, 36, and 60 h after  
730 subsequent rewatering (RW). Metabolites that showed significant (Mann-Whitney-Wilcoxon  
731 test,  $P < 0.05$ ) differences in constitutive levels between the control samples at the stress time  
732 point and any of the control samples taken at the different time points after rewatering are shown

733 in the heat map. Values are averages of the median-normalized and log<sub>2</sub>-transformed relative  
734 metabolite content as indicated by the color code. Asterisks indicate the level of significance (\* P  
735 < 0.05; \*\* P < 0.01; \*\*\* P < 0.001). Note that the first column of each cultivar (Control - Severe  
736 stress) has no asterisks since it is the reference for comparison with the other columns.

737

738

### 739 **Figure 3. Constitutive levels of metabolites in developing seeds**

740 Developing seeds were collected from three rice cultivars under well-watered control conditions  
741 in parallel to collection of samples from plants exposed to severe stress and 12, 36, and 60 h after  
742 subsequent rewatering (RW). Metabolites that showed significant (Mann-Whitney-Wilcoxon  
743 test, P < 0.05) differences in constitutive levels between the control samples at the stress time  
744 point and any of the control samples taken at the different time points after rewatering are shown  
745 in the heat map. Values are averages of the median-normalized and log<sub>2</sub>-transformed relative  
746 metabolite content as indicated by the color code. Asterisks indicate the level of significance (\* P  
747 < 0.05; \*\* P < 0.01; \*\*\* P < 0.001). Note that the first column of each cultivar (Control - Severe  
748 stress) has no asterisks since it is the reference for comparison with the other columns.

749

### 750 **Figure 4. Changes in the levels of stress-responsive metabolites in flag leaves at the** 751 **flowering stage after rewatering**

752 Venn diagrams show the number of common and cultivar-specific metabolites that showed a  
753 significant (Mann-Whitney-Wilcoxon test, P < 0.05) increase (A, C, E) or decrease (B, D, F) in  
754 levels 12 h (A, B), 36 h (C, D), and 60 h (E, F) after rewatering (RW) relative to severe stress  
755 conditions. Numbers in parentheses indicate the total number of metabolites with

756 increased/decreased abundance in each cultivar. The corresponding metabolites are shown in the  
757 heat map (G). The values, expressed as  $\log_2$ -fold change between plants after rewatering and  
758 plants under severe stress, are indicated by the color code and hierarchically clustered using  
759 Euclidean distance and average linkage. Asterisks indicate the level of significance (\*  $P < 0.05$ ;  
760 \*\*  $P < 0.01$ ; \*\*\*  $P < 0.001$ ).

761

762 **Figure 5. Changes in the levels of stress-responsive metabolites in flag leaves at the early**  
763 **grain-filling stage after rewatering**

764 Venn diagrams show the number of common and cultivar-specific metabolites that showed a  
765 significant (Mann-Whitney-Wilcoxon test,  $P < 0.05$ ) increase (A, C, E) or decrease (B, D, F) in  
766 levels 12 h (A, B), 36 h (C, D), and 60 h (E, F) after rewatering (RW) relative to severe stress  
767 conditions. Numbers in parentheses indicate the total number of metabolites with  
768 increased/decreased abundance in each cultivar. The corresponding metabolites are shown in the  
769 heat map (G). The values, expressed as  $\log_2$ -fold change between plants after rewatering and  
770 plants under severe stress, are indicated by the color code and hierarchically clustered using  
771 Euclidean distance and average linkage. Asterisks indicate the level of significance (\*  $P < 0.05$ ;  
772 \*\*  $P < 0.01$ ; \*\*\*  $P < 0.001$ ).

773

774 **Figure 6. Changes in the levels of stress-responsive metabolites in flowering spikelets after**  
775 **rewatering**

776 Venn diagrams show the number of common and cultivar-specific metabolites that showed a  
777 significant (Mann-Whitney-Wilcoxon test,  $P < 0.05$ ) increase (A, C, E) or decrease (B, D, F) in  
778 levels 12 h (A, B), 36 h (C, D), and 60 h (E, F) after rewatering (RW) relative to severe stress

779 conditions. Numbers in parentheses indicate the total number of metabolites with  
780 increased/decreased abundance in each cultivar. The corresponding metabolites are shown in the  
781 heat map (G). The values, expressed as  $\log_2$ -fold change between plants after rewatering and  
782 plants under severe stress, are indicated by the color code and hierarchically clustered using  
783 Euclidean distance and average linkage. Asterisks indicate the level of significance (\*  $P < 0.05$ ;  
784 \*\*  $P < 0.01$ ; \*\*\*  $P < 0.001$ ).

785

786 **Figure 7. Changes in the levels of stress-responsive metabolites in developing seeds after**  
787 **rewatering**

788 Venn diagrams show the number of common and cultivar-specific metabolites that showed a  
789 significant (Mann-Whitney-Wilcoxon test,  $P < 0.05$ ) increase (A, C, E) or decrease (B, D, F) in  
790 levels 12 h (A, B), 36 h (C, D), and 60 h (E, F) after rewatering (RW) relative to severe stress  
791 conditions. Numbers in parentheses indicate the total number of metabolites with  
792 increased/decreased abundance in each cultivar. The corresponding metabolites are shown in the  
793 heat map (G). The values, expressed as  $\log_2$ -fold change between plants after rewatering and  
794 plants under severe stress, are indicated by the color code and hierarchically clustered using  
795 Euclidean distance and average linkage. Asterisks indicate the level of significance (\*  $P < 0.05$ ;  
796 \*\*  $P < 0.01$ ; \*\*\*  $P < 0.001$ ).

797

798 **Additional files**

799 **Additional file 1 (PDF). Venn diagrams showing the number of metabolites in flag leaves at**  
800 **the flowering stage with altered levels after rewatering relative to control levels**

801 Numbers indicate common and cultivar-specific metabolites with a significant (Mann-Whitney-  
802 Wilcoxon test,  $P < 0.05$ ) increase (A, C, E) or decrease (B, D, F) in levels 12 h (A, B), 36 h (C,  
803 D), and 60 h (E, F) after post-stress rewatering relative to levels in control plants. Numbers in  
804 parentheses indicate the total number of metabolites with increased/decreased abundance in each  
805 cultivar.

806

807 **Additional file 2 (PDF). Heat map of metabolites in flag leaves at the flowering stage with**  
808 **altered levels under stress and/or after rewatering relative to control levels**

809 Metabolites showing significant (Mann-Whitney-Wilcoxon test,  $P < 0.05$ ) changes in levels  
810 under severe stress and 12 h, 36 h, and 60 h after rewatering (RW) relative to control levels.

811 Metabolites correspond to those illustrated in the Venn diagrams in Additional file 1. The values,  
812 expressed as  $\log_2$ -fold change in the indicated comparisons, are color coded and hierarchically  
813 clustered using Euclidean distance and average linkage. Asterisks indicate the level of  
814 significance (\*  $P < 0.05$ ; \*\*  $P < 0.01$ ; \*\*\*  $P < 0.001$ ). Metabolites in black font are responsive to  
815 either only stress or to both stress and rewatering, while metabolites in red font are responsive  
816 only to rewatering.

817

818 **Additional file 3 (PDF). Venn diagrams showing the number of metabolites in flag leaves at**  
819 **the early grain-filling stage with altered levels after rewatering relative to control levels**

820 Numbers indicate common and cultivar-specific metabolites with a significant (Mann-Whitney-  
821 Wilcoxon test,  $P < 0.05$ ) increase (A, C, E) or decrease (B, D, F) in levels 12 h (A, B), 36 h (C,  
822 D), and 60 h (E, F) after rewatering relative to levels in control plants. Numbers in parentheses  
823 indicate the total number of metabolites with increased/decreased abundance in each cultivar.



824

825 **Additional file 4 (PDF). Heat map of metabolites in flag leaves at the early grain-filling**  
826 **stage with altered levels under stress and/or after rewatering relative to control levels**

827 Metabolites showing significant (Mann-Whitney-Wilcoxon test,  $P < 0.05$ ) changes in levels  
828 under severe stress and 12 h, 36 h, and 60 h after rewatering (RW) relative to control levels.

829 Metabolites correspond to those illustrated in the Venn diagrams in Additional file 3. The values,  
830 expressed as  $\log_2$ -fold change in the indicated comparisons, are color coded and hierarchically  
831 clustered using Euclidean distance and average linkage. Asterisks indicate the level of  
832 significance (\*  $P < 0.05$ ; \*\*  $P < 0.01$ ; \*\*\*  $P < 0.001$ ). Metabolites in black font are responsive to  
833 either only stress or to both stress and rewatering, while metabolites in red font are responsive  
834 only to rewatering.

835

836 **Additional file 5 (PDF). Venn diagrams showing the number of metabolites in flowering**  
837 **spikelets with altered levels after rewatering relative to control levels**

838 Numbers indicate common and cultivar-specific metabolites with a significant (Mann-Whitney-  
839 Wilcoxon test,  $P < 0.05$ ) increase (A, C, E) or decrease (B, D, F) in levels 12 h (A, B), 36 h (C,  
840 D), and 60 h (E, F) after rewatering relative to levels in control plants. Numbers in parentheses  
841 indicate the total number of metabolites with increased/decreased abundance in each cultivar.

842

843 **Additional file 6 (PDF). Heat map of metabolites in flowering spikelets with altered levels**  
844 **under stress and/or after rewatering relative to control levels**

845 Metabolites showing significant (Mann-Whitney-Wilcoxon test,  $P < 0.05$ ) changes in levels  
846 under severe stress and 12 h, 36 h, and 60 h after rewatering (RW) relative to control levels.

847 Metabolites correspond to those illustrated in the Venn diagrams in Additional file 5. The values,  
848 expressed as log<sub>2</sub>-fold change in the indicated comparisons, are color coded and hierarchically  
849 clustered using Euclidean distance and average linkage. Asterisks indicate the level of  
850 significance (\* P < 0.05; \*\* P < 0.01; \*\*\* P < 0.001). Metabolites in black font are responsive to  
851 either only stress or to both stress and rewatering, while metabolites in red font are responsive  
852 only to rewatering.

853

854 **Additional file 7 (PDF). Venn diagrams showing the number of metabolites in developing**  
855 **seeds with altered levels after rewatering relative to control levels**

856 Numbers indicate common and cultivar-specific metabolites with a significant (Mann-Whitney-  
857 Wilcoxon test, P < 0.05) increase (A, C, E) or decrease (B, D, F) in levels 12 h (A, B), 36 h (C,  
858 D), and 60 h (E, F) after rewatering relative to levels in control plants. Numbers in parentheses  
859 indicate the total number of metabolites with increased/decreased abundance in each cultivar.

860

861 **Additional file 8 (PDF). Heat map of metabolites in developing seeds with altered levels**  
862 **under stress and after rewatering relative to control levels**

863 Metabolites showing significant (Mann-Whitney-Wilcoxon test, P < 0.05) changes in levels  
864 under severe stress and 12 h, 36 h, and 60 h after rewatering (RW) relative to control levels.

865 Metabolites correspond to those illustrated in the Venn diagrams in Additional file 7. The values,  
866 expressed as log<sub>2</sub>-fold change in the indicated comparisons, are color coded and hierarchically  
867 clustered using Euclidean distance and average linkage. Asterisks indicate the level of  
868 significance (\* P < 0.05; \*\* P < 0.01; \*\*\* P < 0.001). Metabolites in black font are responsive to

869 either only stress or to both stress and rewatering, while metabolites in red font are responsive  
870 only to rewatering.

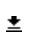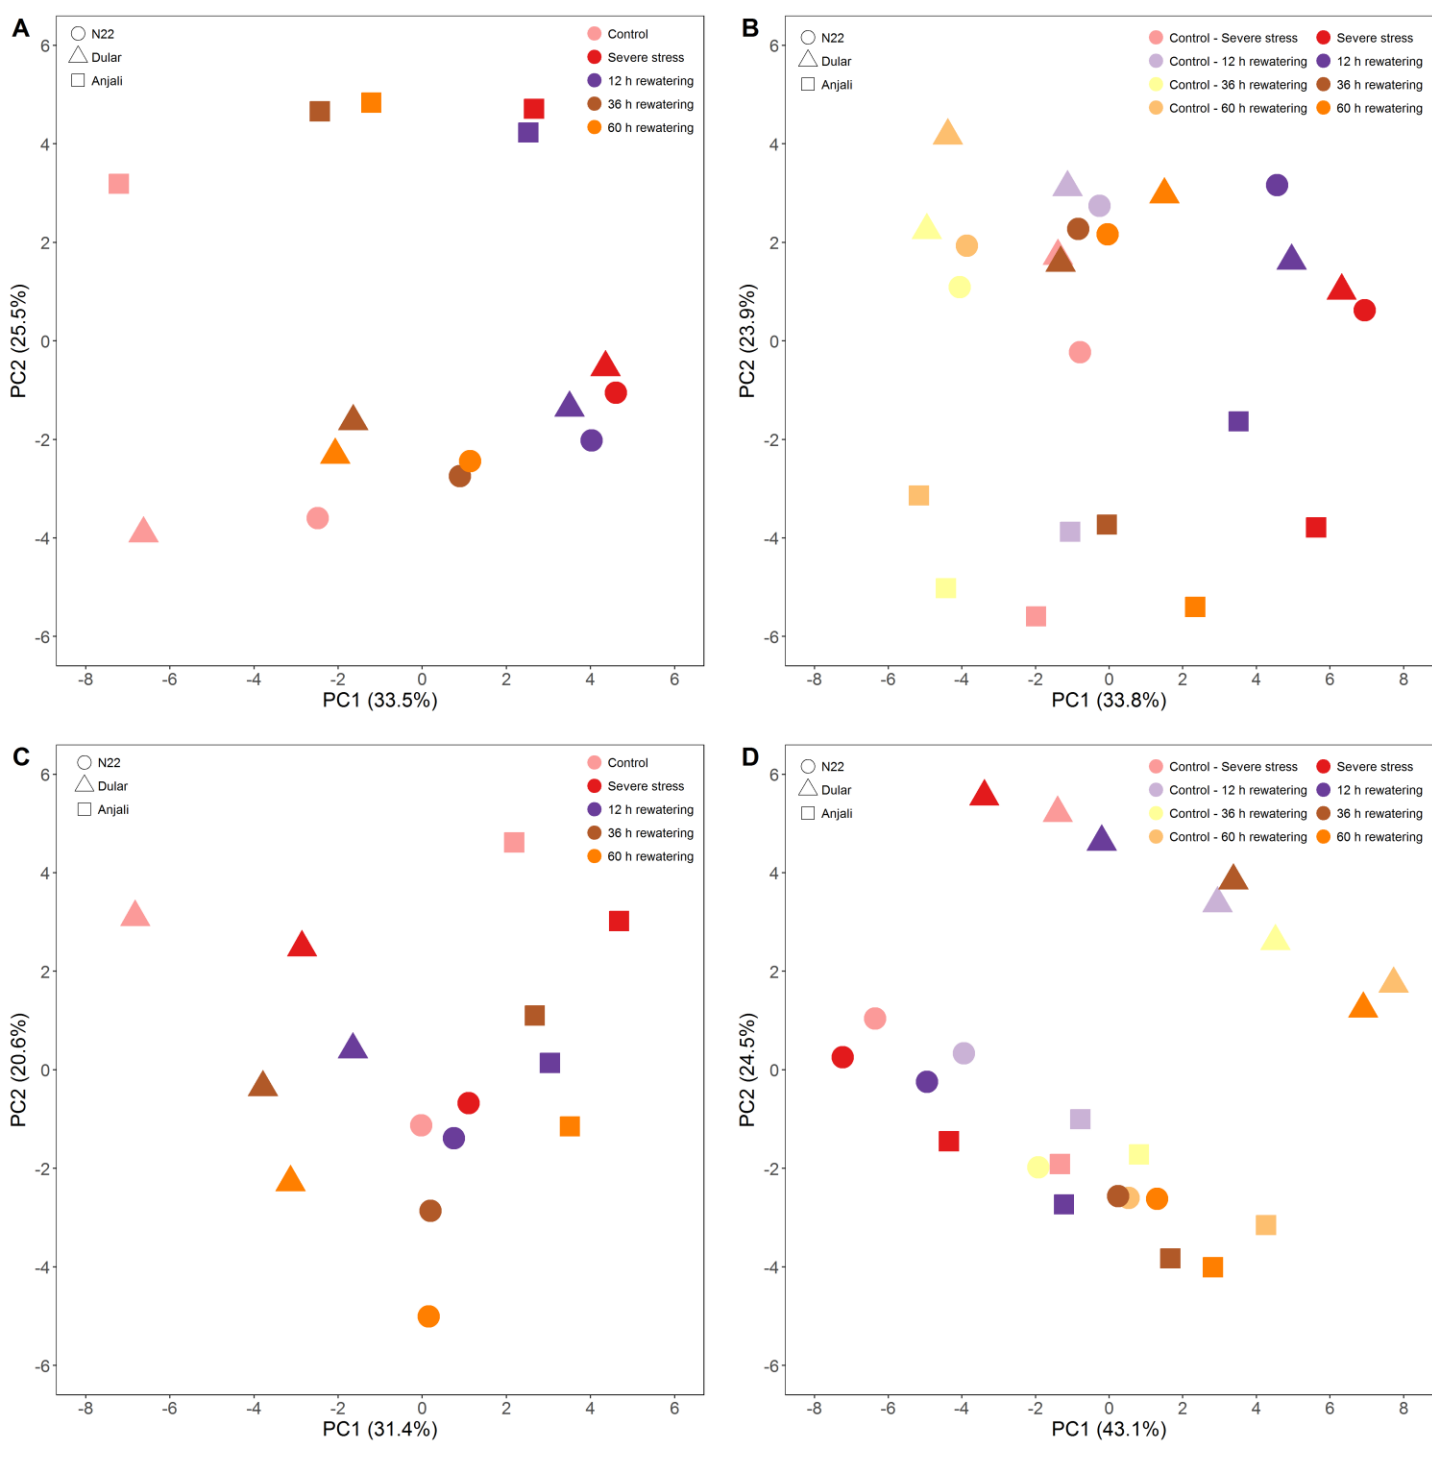

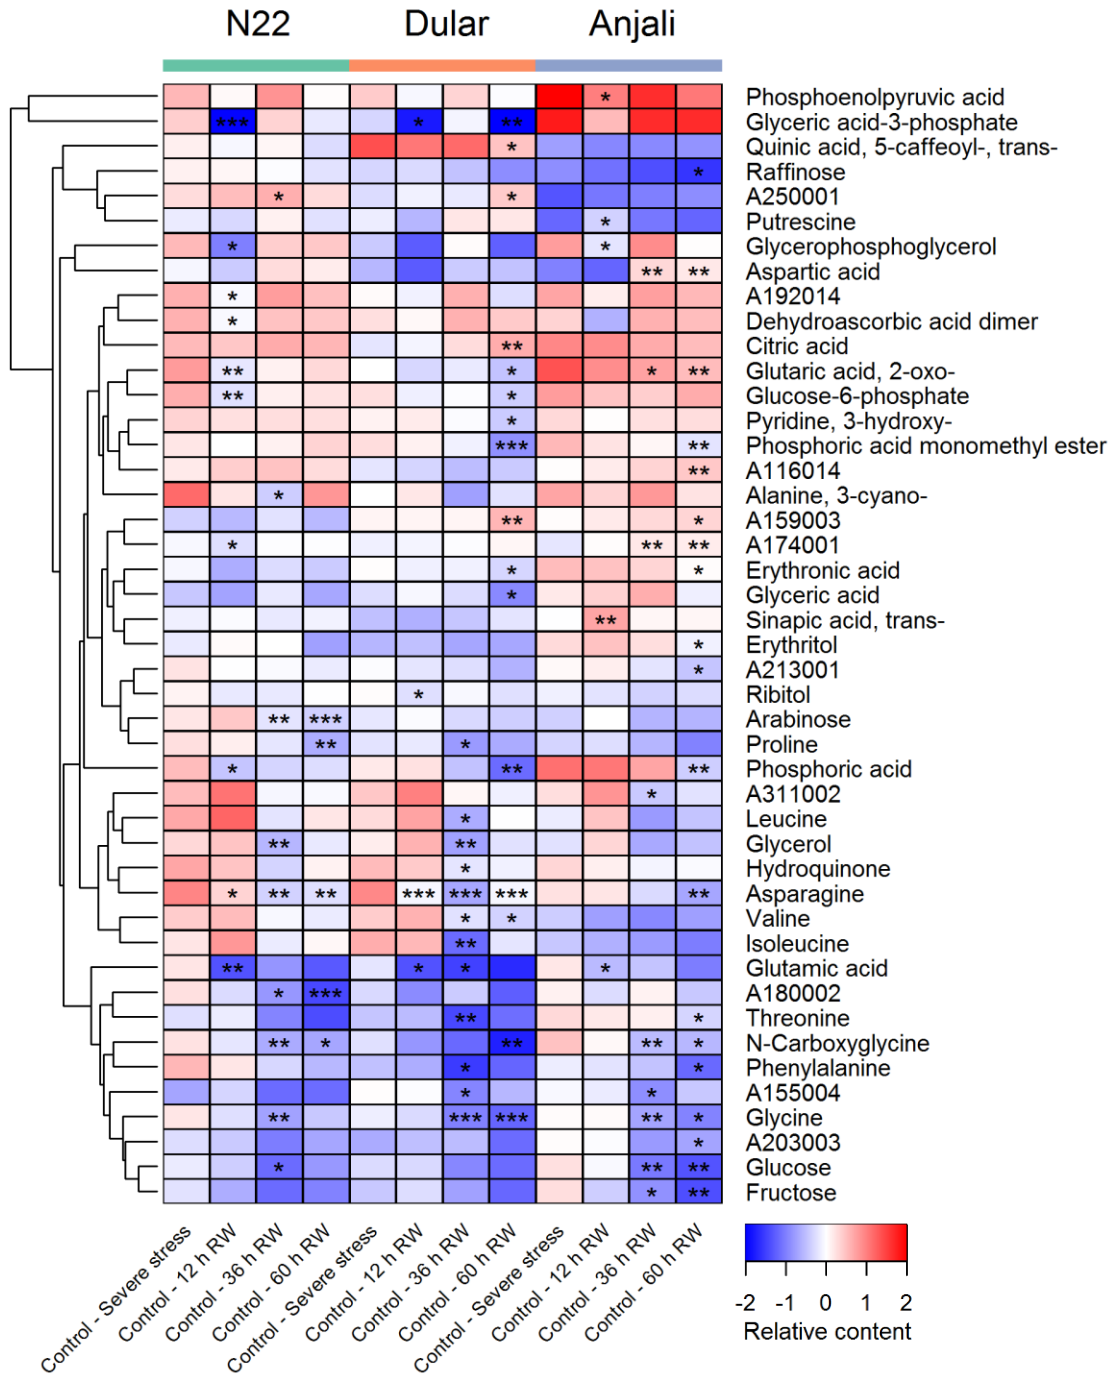

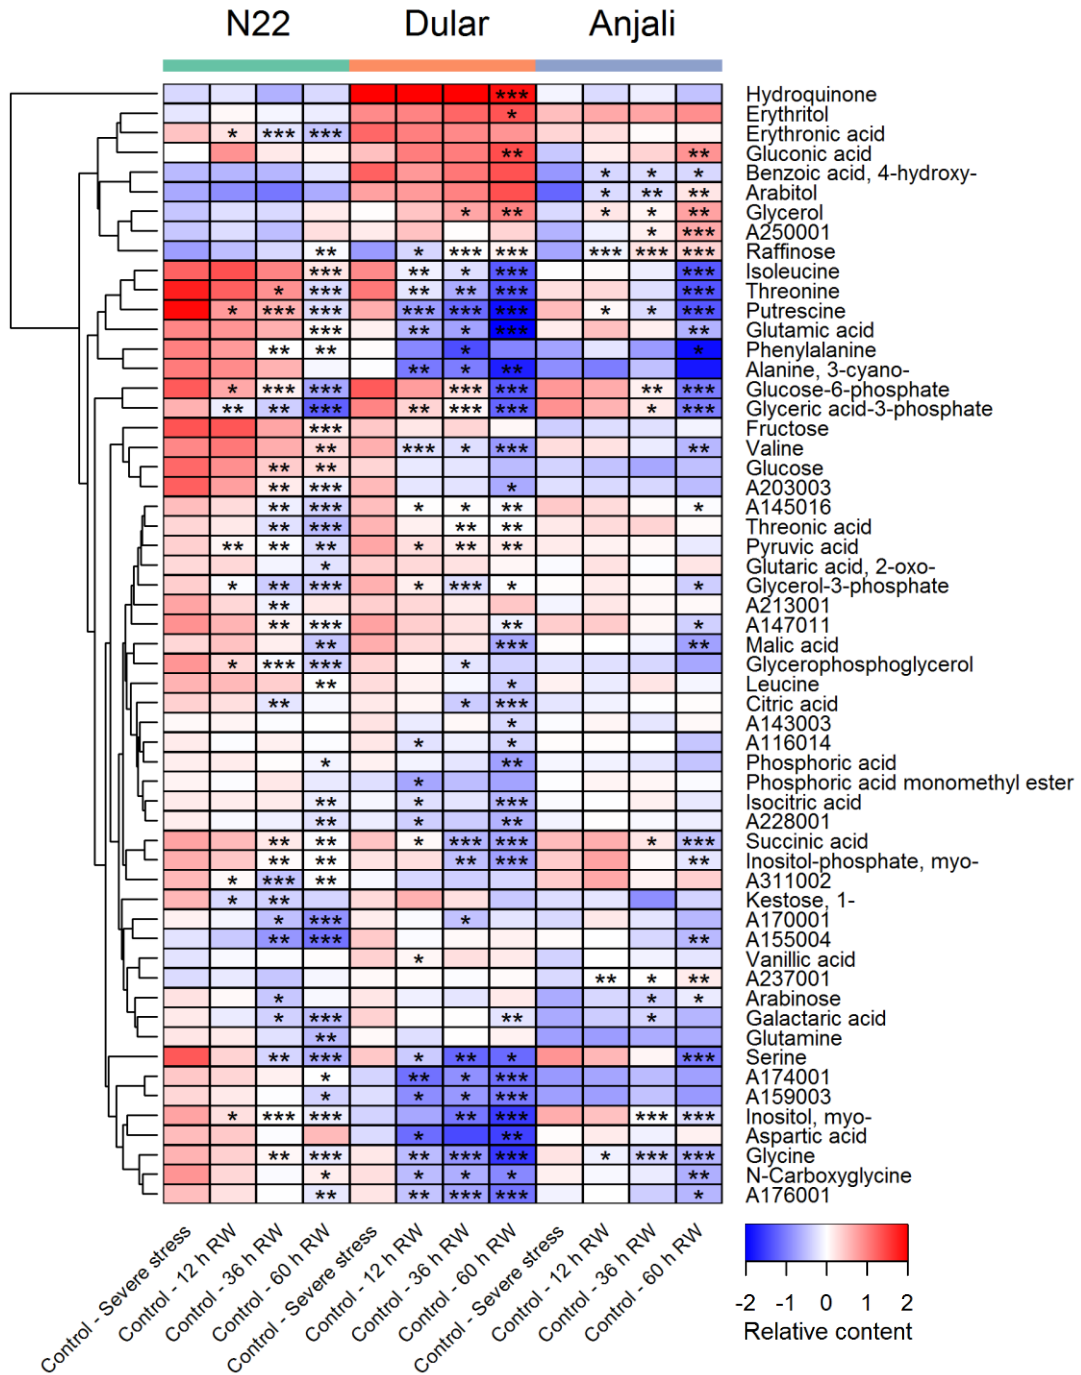



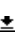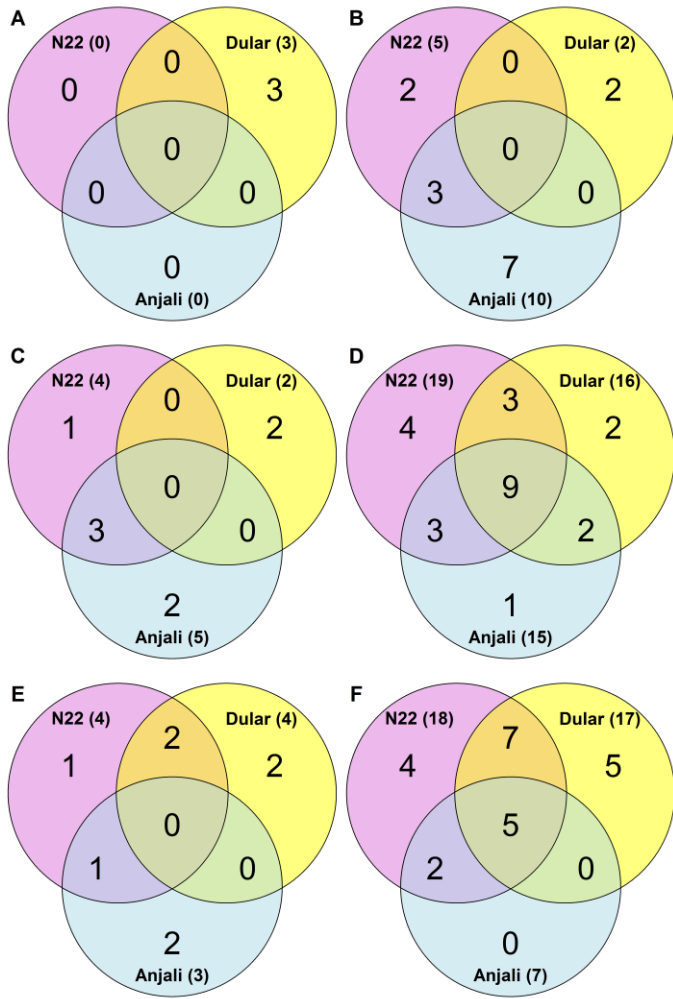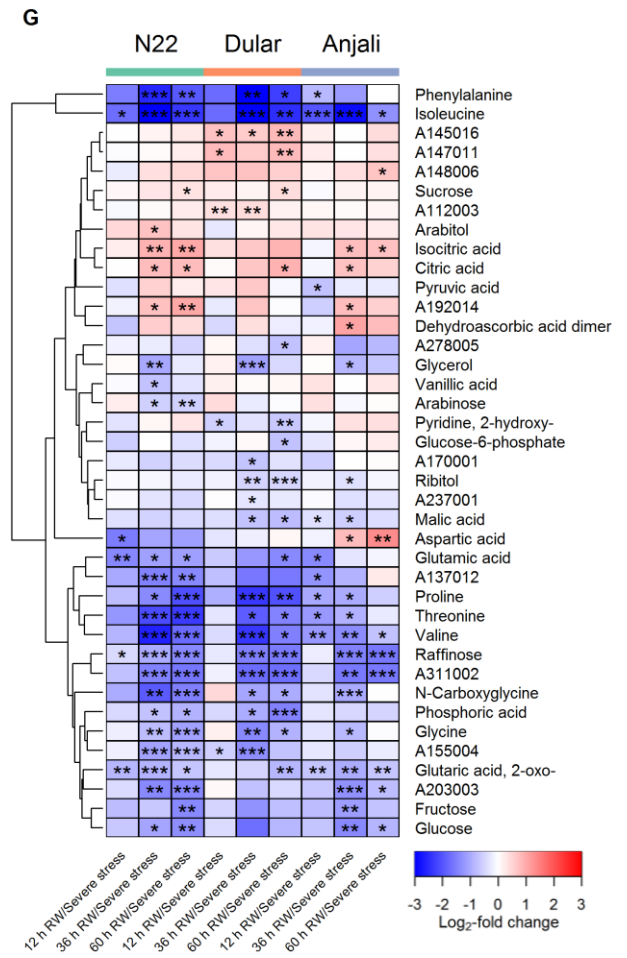



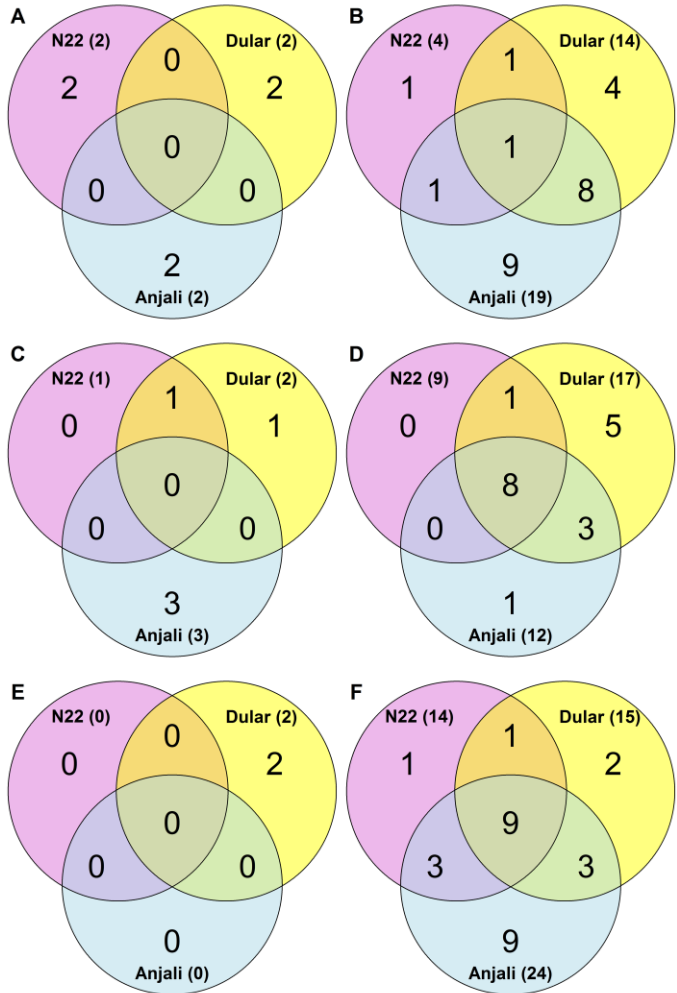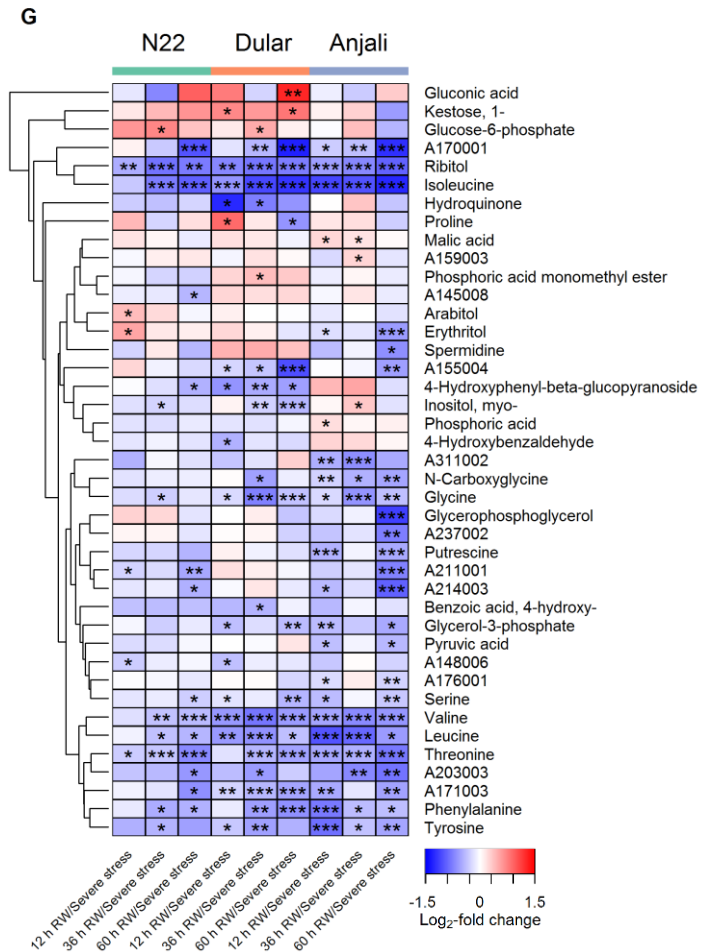

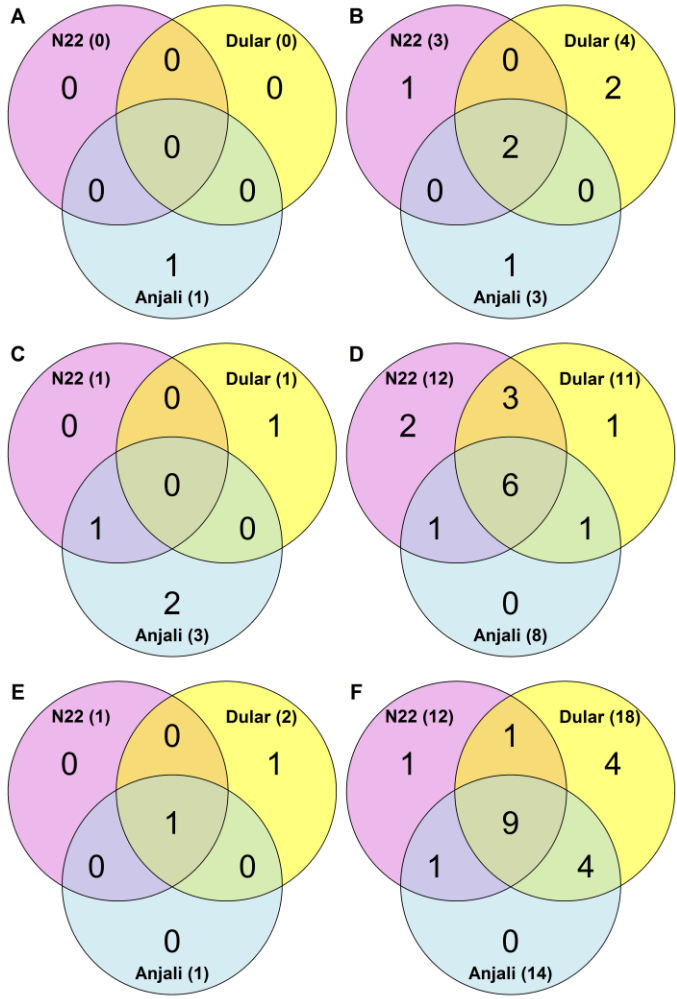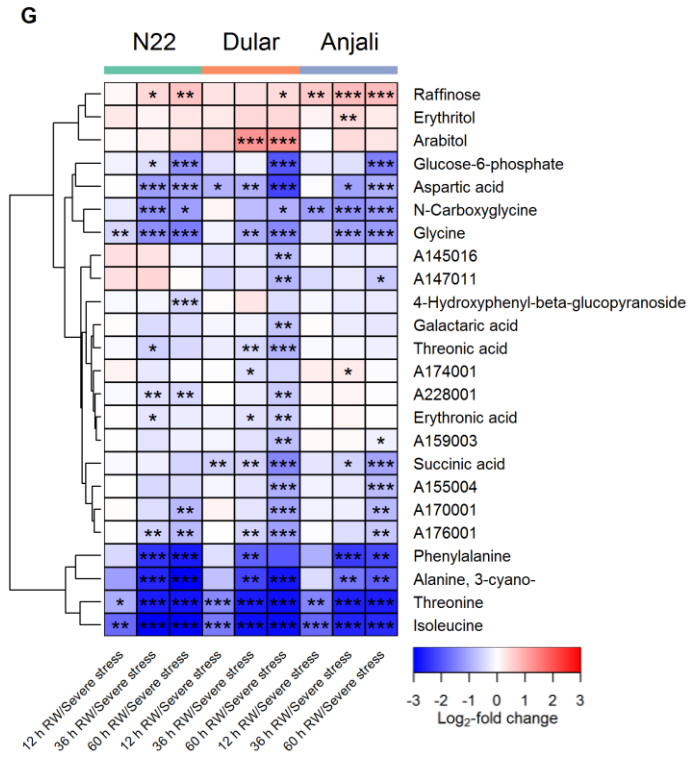

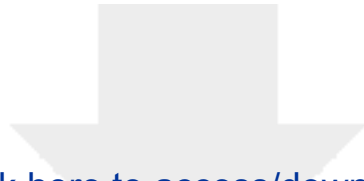

Click here to access/download  
**Supplementary Material**  
Additional file 1\_HxD\_rewatering.pdf

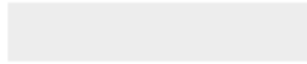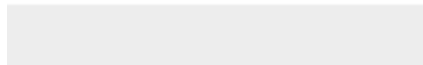



Click here to access/download  
**Supplementary Material**  
Additional file 2\_HxD\_rewatering.pdf

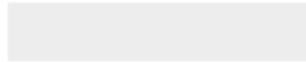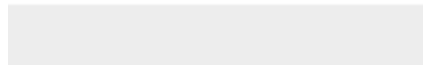

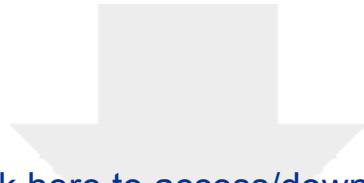

Click here to access/download  
**Supplementary Material**  
Additional file 3\_HxD\_rewatering.pdf

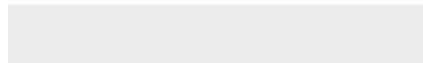



Click here to access/download  
**Supplementary Material**  
Additional file 4\_HxD\_rewatering.pdf

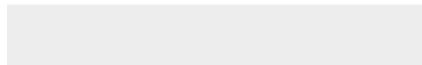



Click here to access/download  
**Supplementary Material**  
Additional file 5\_HxD\_rewatering.pdf





Click here to access/download  
**Supplementary Material**  
Additional file 6\_HxD\_rewatering.pdf

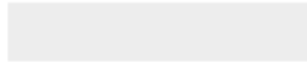



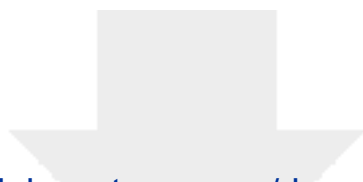

Click here to access/download  
**Supplementary Material**  
Additional file 7\_HxD\_rewatering.pdf

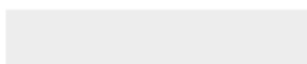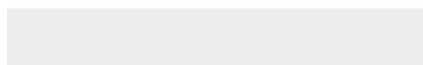



Click here to access/download  
**Supplementary Material**  
Additional file 8\_HxD\_rewatering.pdf



Supplement: giz102_giga-d-19-00175_original_submission.pdf [file giz102_giga-d-19-00175_original_submission.pdf]
